# Supplementary material for: Revealing the pH-dependent mechanism of nitrate electrochemical reduction to ammonia on single-atom catalysts
Source: Royal Society of Chemistry journal article supplement (doi:10.1039/d2nr02545k), 2022-01-01
Supplement: d2nr02545k1.pdf [file d2nr02545k1.pdf]

## SUPPORTING INFORMATION

### Revealing the pH-Dependent Mechanism of Nitrate Electrochemical reduction to Ammonia on Single-Atom Catalysts

Jingjing Yan<sup>#1</sup>, Haoxiang Xu<sup>#1</sup>, Le Chang<sup>2</sup>, Aijun Lin<sup>\*1</sup>, and Daojian Cheng<sup>\*1</sup>

*<sup>1</sup>State Key Laboratory of Organic-Inorganic Composites, Beijing Key Laboratory of Energy Environmental Catalysis, Beijing University of Chemical Technology, Beijing 100029, People's Republic of China*

*<sup>2</sup> Yangtze Delta Region Institute (Huzhou) & School of Resources and Environment, University of Electronic Science and Technology of China, Huzhou 313001, PR China*

\* Corresponding authors. E-mail addresses: [chengdj@mail.buct.edu.cn](mailto:chengdj@mail.buct.edu.cn) (D. Cheng), [linaj@mail.buct.edu.cn](mailto:linaj@mail.buct.edu.cn) (A. Lin)

# These authors contribute equally.

|                                    |    |
|------------------------------------|----|
| SUPPORTING INFORMATION.....        | 1  |
| PART I. Supplemental Notes .....   | 2  |
| PART II. Supplemental Figures..... | 7  |
| PART III. Supplemental Tables..... | 22 |

\_Toc96270571

# PART I. Supplemental Notes

## Supplemental Note 1

For the single atom adsorption on basal plane, its thermodynamic stability is judged based on the formation energy  $E_{\text{form}}$ . When metal atoms are adsorbed on the basal plane of  $\text{MoS}_2$ , the calculation formula is as follows:

$$E_{\text{form}} = E_{\text{TM-MoS}_2} - E_{\text{TM}} - E_{\text{MoS}_2}$$

For replacing Mo or S of the basal plane, the calculation formula is as follows:

$$E_{\text{form}} = E_{\text{TM-MoS}_2} + E_{\text{TM}} - E_{\text{MoS}_2} - E_{\text{Mo/S}}$$

When the metal atoms are loaded on the molybdenum disulfide edge surface, the formation energy is calculated as follows:

$$E_{\text{form}} = E_{\text{TM-MoS}_2} - E_{\text{TM}} - E_{\text{MoS}_2} - 8n * E_{\text{S}}$$

Among them,  $n$  refers to the coverage of S atoms, and the values are 12.5%, 25%, 37.5%, 50%.  $E_{\text{TM-MoS}_2}$ ,  $E_{\text{TM}}$ ,  $E_{\text{MoS}_2}$ , and  $E_{\text{S}}$  are the energies of TM-MoS<sub>2</sub>, transition metal atom from bulk, MoS<sub>2</sub> slab, and S atom from bulk after considering the coverage of S atoms, respectively.”

## Supplemental Note 2

To avoid calculating the energy of charged  $\text{NO}_3^-$  directly, gaseous  $\text{HNO}_3$  and  $\text{H}_2$  is chosen as a reference instead<sup>[1]</sup>. The adsorption energy of  $\text{NO}_3^-$  ( $\Delta G_{* \text{NO}_3}$ ) is described as

$$\Delta G_{* \text{NO}_3} = G_{* \text{NO}_3} - G_{*} - G_{\text{HNO}_3(\text{g})} + 1/2 G_{\text{H}_2(\text{g})}$$

where  $G_{* \text{NO}_3}$ ,  $G_{*}$ ,  $G_{\text{HNO}_3(\text{g})}$ , and  $G_{\text{H}_2(\text{g})}$  are the Gibbs free energy of  $\text{NO}_3^-$  adsorbed on substrates, as well as  $\text{HNO}_3$  and  $\text{H}_2$  molecules in the gas phase, respectively. The adsorption free energy of other intermediates on SACs were also calculated by taking gaseous  $\text{HNO}_3$  and  $\text{H}_2$  as a reference.

## Elementary steps of NO<sub>3</sub>RR

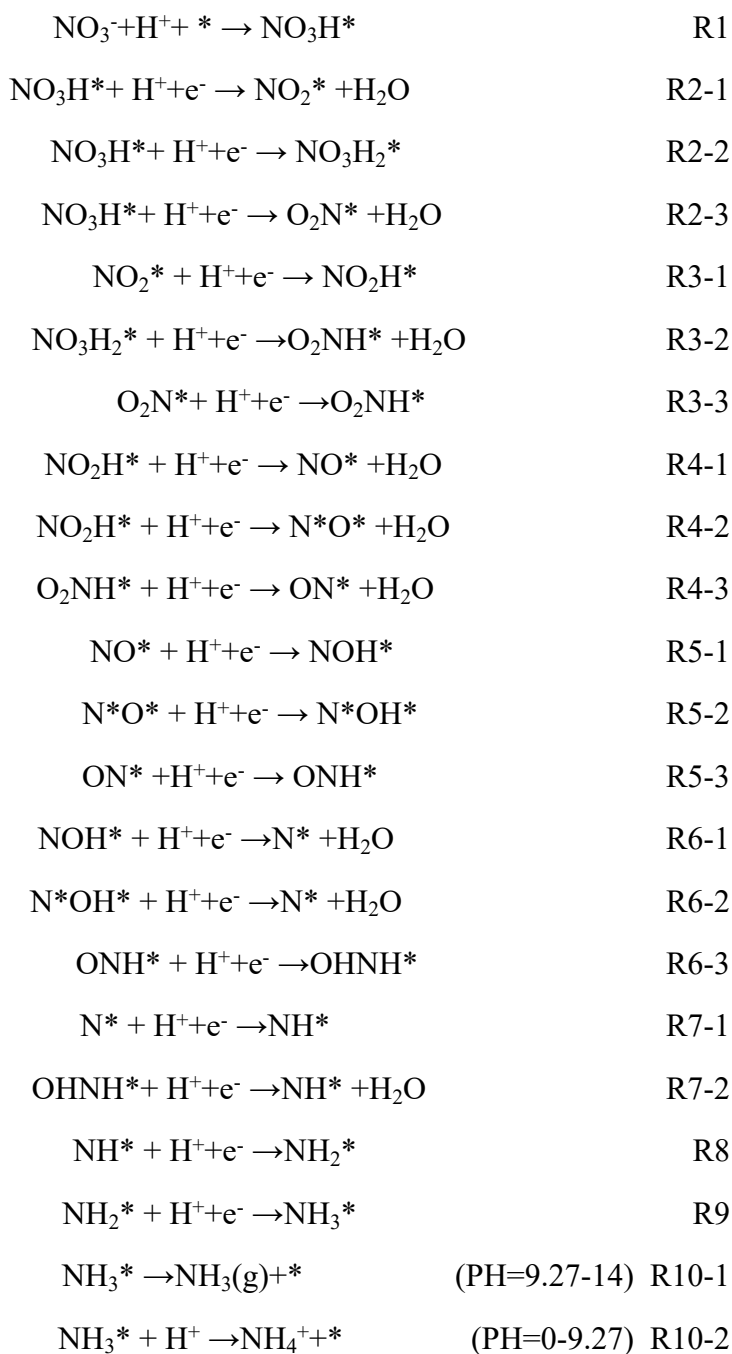

For each intermediate, the calculation of free energy is shown as follow.

$$G(*) = E(*) + \text{ZPE} + T\Delta S$$

For each elementary step, the Gibbs reaction free energy  $\Delta G$  is the difference between the free energies of the reactants and products, and is expressed as follows. Since electron transfer is involved in the elementary reaction step and the reaction uses RHE

as the reference electrode,  $G(H^+ + e^-) = 1/2G_{H_2}$ .

$$\Delta G_1^0 = G(NO_3H^*) - G(NO_3^-) - G(H^+ + e^-)$$

$$\Delta G_{2-1}^0 = G(NO_2^*) + G(H_2O) - G(NO_3H^*) - G(H^+ + e^-)$$

$$\Delta G_{2-2}^0 = G(NO_3H_2^*) - G(NO_3H^*) - G(H^+ + e^-)$$

$$\Delta G_{2-3}^0 = G(O_2N^*) + G(H_2O) - G(NO_3H^*) - G(H^+ + e^-)$$

$$\Delta G_{3-1}^0 = G(NO_2H^*) - G(NO_2^*) - G(H^+ + e^-)$$

$$\Delta G_{3-2}^0 = G(O_2NH^*) + G(H_2O) - G(NO_3H_2^*) - G(H^+ + e^-)$$

$$\Delta G_{3-3}^0 = G(O_2NH^*) - G(O_2N^*) - G(H^+ + e^-)$$

$$\Delta G_{4-1}^0 = G(NO^*) + G(H_2O) - G(NO_2H^*) - G(H^+ + e^-)$$

$$\Delta G_{4-2}^0 = G(N^*O^*) + G(H_2O) - G(NO_2H^*) - G(H^+ + e^-)$$

$$\Delta G_{4-3}^0 = G(ON^*) + G(H_2O) - G(O_2NH^*) - G(H^+ + e^-)$$

$$\Delta G_{5-1}^0 = G(NOH^*) - G(NO^*) - G(H^+ + e^-)$$

$$\Delta G_{5-2}^0 = G(N^*OH^*) - G(N^*O^*) - G(H^+ + e^-)$$

$$\Delta G_{5-3}^0 = G(ONH^*) - G(ON^*) - G(H^+ + e^-)$$

$$\Delta G_{6-1}^0 = G(N^*) + G(H_2O) - G(NOH^*) - G(H^+ + e^-)$$

$$\Delta G_{6-2}^0 = G(N^*) + G(H_2O) - G(N^*OH^*) - G(H^+ + e^-)$$

$$\Delta G_{6-3}^0 = G(OHNH^*) - G(ONH^*) - G(H^+ + e^-)$$

$$\Delta G_{7-1}^0 = G(NH^*) - G(N^*) - G(H^+ + e^-)$$

$$\Delta G_{7-2}^0 = G(NH^*) + G(H_2O) - G(OHNH^*) - G(H^+ + e^-)$$

$$\Delta G_8^0 = G(NH_2^*) - G(NH^*) - G(H^+ + e^-)$$

$$\Delta G_9^0 = G(NH_3^*) - G(NH_2^*) - G(H^+ + e^-)$$

$$\Delta G_{10-1}^0 = G(^*) + G(NH_3) - G(NH_3^*)$$

$$\Delta G_{10-2}^0 = G(^*) + G(NH_4^+) - G(NH_3^*) - G(H^+)$$

Correction of pH to Gibbs free energy<sup>[2]</sup>, where  $k_B$  is the Boltzmann constant and T is the room temperature.

$$\Delta G_1 = \Delta G_1^0$$

$$\Delta G_2 = \Delta G_2^0 + k_B T \ln 10 \times \text{pH}$$

$$\Delta G_3 = \Delta G_3^0 + k_B T \ln 10 \times \text{pH}$$

$$\Delta G_4 = \Delta G_4^0 + k_B T \ln 10 \times \text{pH}$$

$$\Delta G_5 = \Delta G_5^0 + k_B T \ln 10 \times \text{pH}$$

$$\Delta G_6 = \Delta G_6^0 + k_B T \ln 10 \times \text{pH}$$

$$\Delta G_7 = \Delta G_7^0 + k_B T \ln 10 \times \text{pH}$$

$$\Delta G_8 = \Delta G_8^0 + k_B T \ln 10 \times \text{pH}$$

$$\Delta G_9 = \Delta G_9^0 + k_B T \ln 10 \times \text{pH}$$

$$\Delta G_{10} = \Delta G_{10}^0$$

### Supplemental Note 3

HER is regarded as the most competitive reaction to NO<sub>3</sub>RR<sup>[3]</sup>. If we assume: (1) the mass and electron transfer are not the rate determining factors for both HER and NO<sub>3</sub>RR, (2) only HER and NO<sub>3</sub>RR are competing reactions, and (3) the selectivity of NO<sub>3</sub>RR in comparison to HER could be estimated by Boltzmann distribution, the Faradaic efficiency of NO<sub>3</sub>RR can be expressed as:

$$f_{\text{NO}_3\text{RR}} = \frac{1}{1 + e^{\frac{-\delta G}{k_B T}}} \times 100\%$$

where  $\delta G$  is Gibbs free energy difference between HER and NO<sub>3</sub>RR potential determining step,  $k_B$  is the Boltzmann constant, and T is the room temperature.

### Supplemental Note 4

We evaluated the thermodynamic and electrochemical stabilities of these 16 SA-MoS<sub>2</sub> monolayers by the formation energy  $E_f$  and dissolution potential  $U_{diss}$ , which are defined as<sup>[4]</sup>

$$E_f = E_{\text{TM-MoS}_2} - E_{\text{MoS}_2} - E_M$$

$$U_{diss} = U_{diss}^{\circ}(\text{metal, bulk}) - E_f/ne$$

where  $E_M$  is the total energy of metal atom in its most stable bulk structure,  $E_{\text{TM-MoS}_2}$  and  $E_{\text{MoS}_2}$  are the total energies of SA-MoS<sub>2</sub> and substrate,  $U_{diss}^{\circ}(\text{metal, bulk})$  and  $n$  are the standard dissolution potential from bulk metal to solute and the number of electrons involved in the dissolution process, respectively. The values of  $E_f$  and  $U_{diss}$  are listed in **Table S28**.

### Supplemental Note 5

In this section, we construct a chemical-potential-based thermodynamic model to explore how to improve the stability of SAs under realistic conditions. Its chemical potential  $\mu_{NP}(R)$  can be expressed by the Gibbs–Thomson (G-T) relation, as shown in<sup>[5]</sup>

$$\begin{aligned}\mu_{NP}(R) &= 2\Omega\gamma_{me}/R \\ \mu_{SA} &\approx E_{SA/ox} - E_B - E_{ox} \\ \Delta E_{SA}^f(R) &= \mu_{SA} - \mu_{NP}(R)\end{aligned}$$

where  $E_{SA/ox}$  is the total energy of metal SA absorbed on an oxide surface,  $E_B$  the energy of bulk metal per atom, and  $E_{ox}$  the energy of the slab.

## PART II. Supplemental Figures

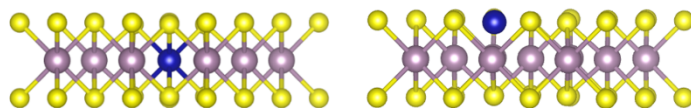

**Supplementary Figure 1.** Side view of the structures of TM (Fe, Co, Ni, Mn) replacing Mo and S atom of basal-MoS<sub>2</sub>.

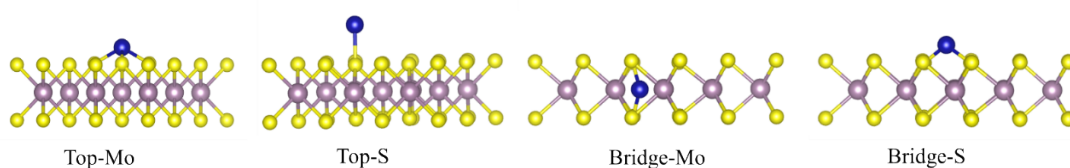

**Supplementary Figure 2.** Side view of the structures of TM (Fe, Co, Ni, Mn) adsorbed on different sites of basal-MoS<sub>2</sub>.

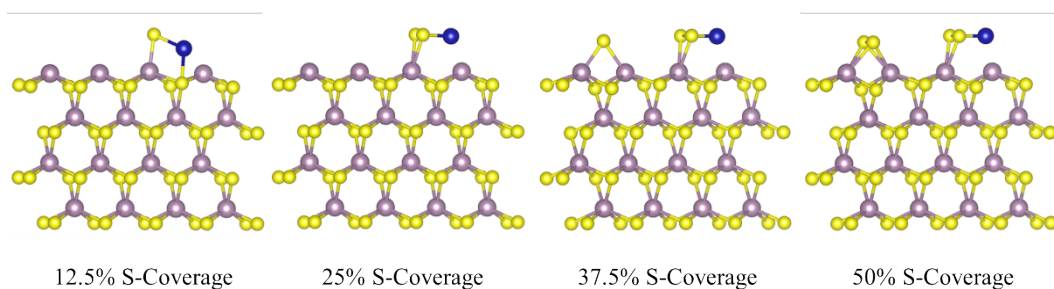

**Supplementary Figure 3.** Side view of the structures of TM (Fe, Co, Ni, Mn) embedded on different coverage of S atoms of edge-MoS<sub>2</sub>.

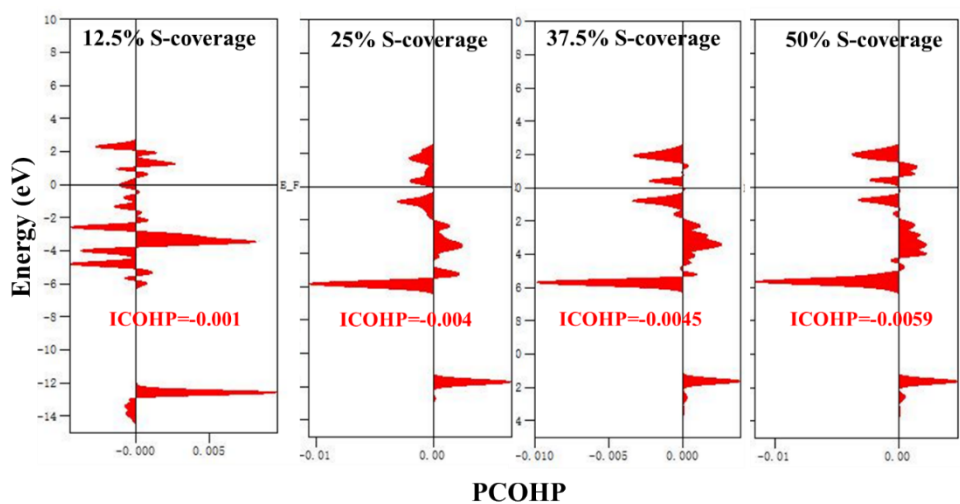

**Supplementary Figure 4.** The crystal orbital Hamilton populations (COHPs) of Co adsorbed on different coverage of S atoms of edge-MoS<sub>2</sub>. The bonding contribution of Co-S in COHP are depicted by red.

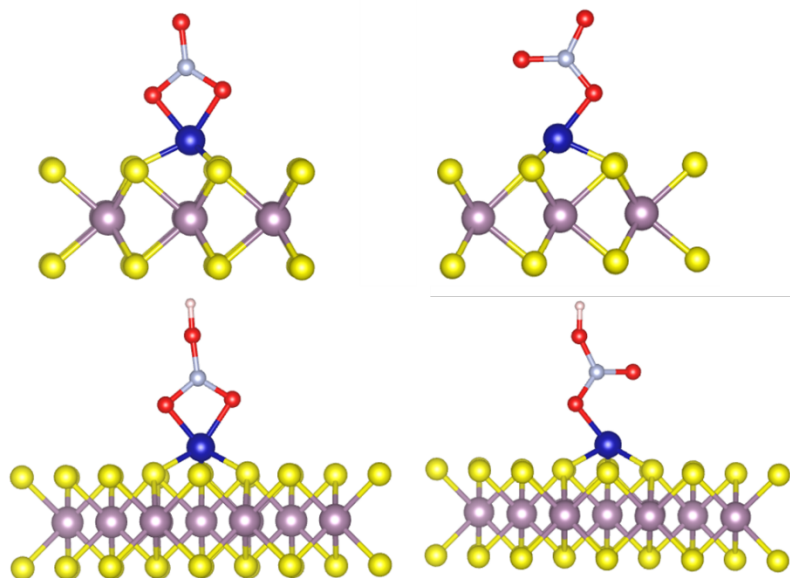

**Supplementary Figure 5.** Two configurations (1-O, 2-O) of NO<sub>3</sub> and NO<sub>3</sub>H. The spheres with various colors represent Metal (blue), O (red), N (grey), and H (white).



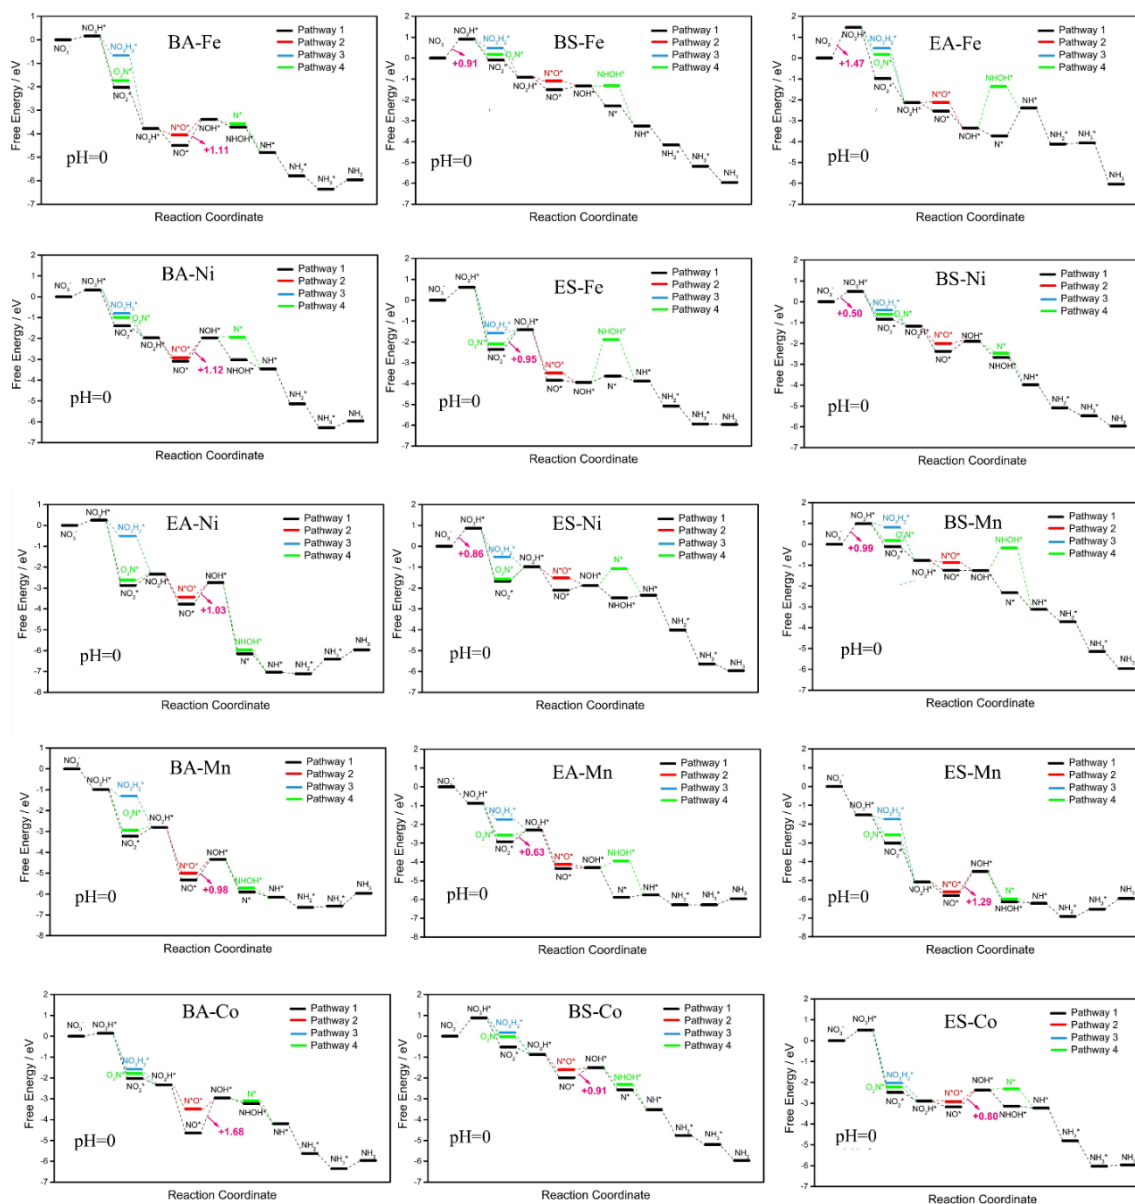

**Supplementary Figure 6.** Free energy diagrams of NO<sub>3</sub>RR via the four pathways on SA-MoS<sub>2</sub> at pH=0, respectively.

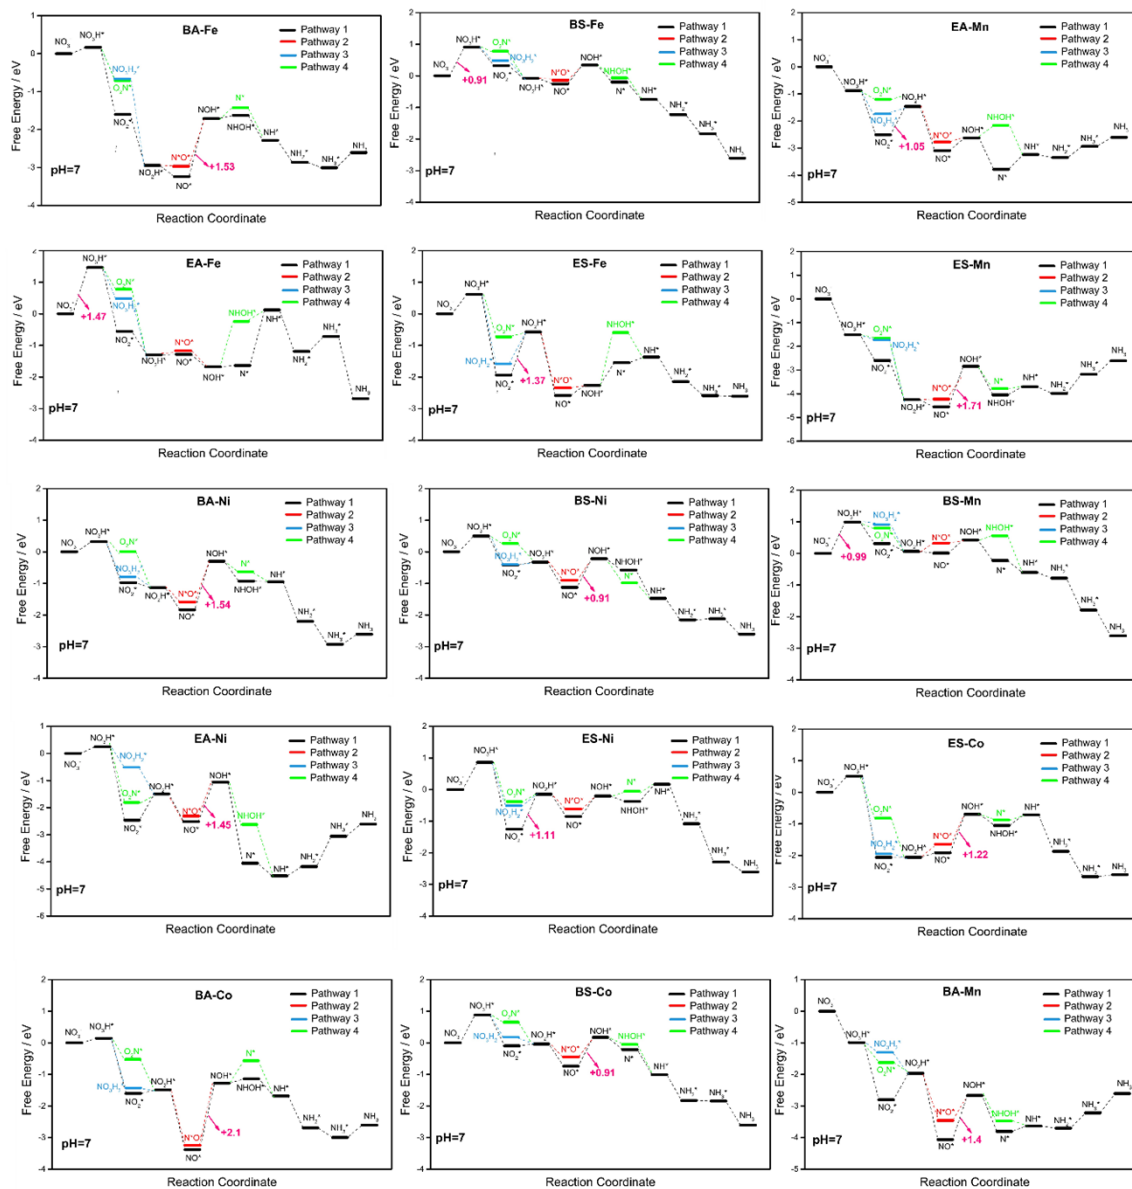

**Supplementary Figure 7.** Free energy diagrams of  $\text{NO}_3\text{RR}$  via the four pathways on SA-MoS<sub>2</sub> at pH=7, respectively.

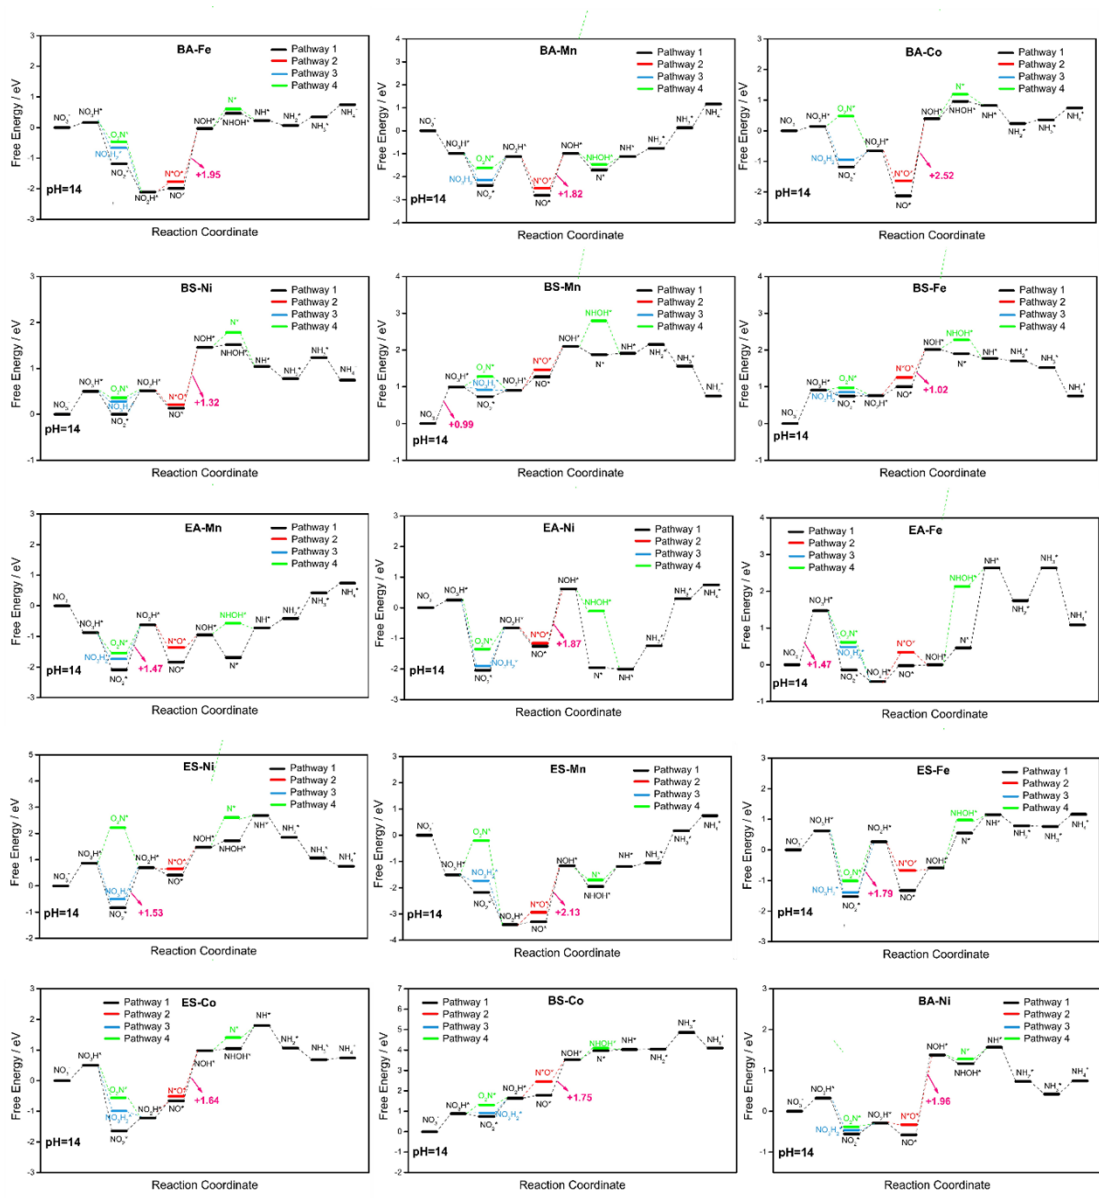

**Supplementary Figure 8.** Free energy diagrams of  $\text{NO}_3\text{RR}$  via the four pathways on  $\text{SA-MoS}_2$  at  $\text{pH}=14$ , respectively.

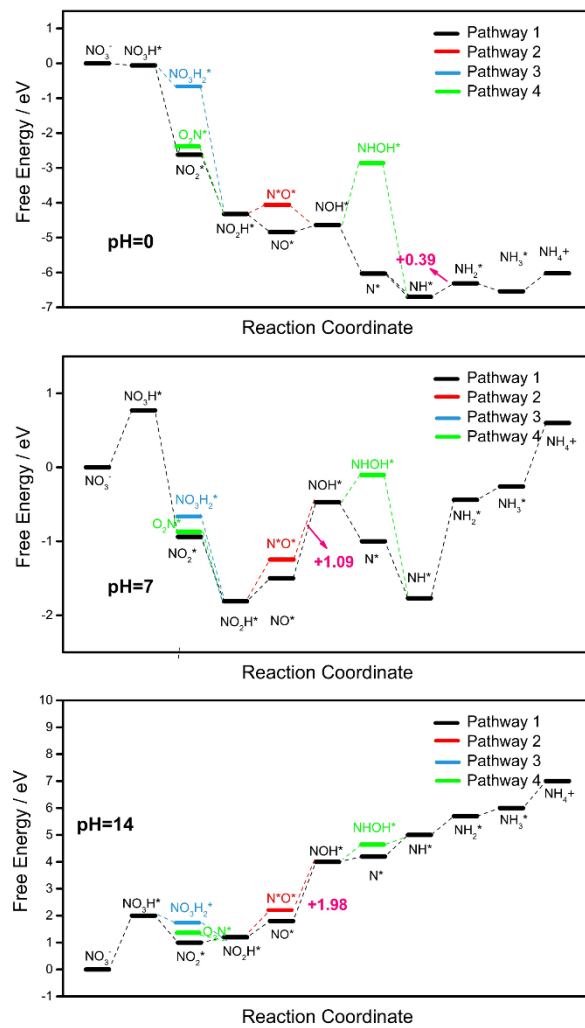

**Figure S9.** Free energies diagram of NO<sub>3</sub>RR on EA-Co derived from PBE+U method. Four kinds of NO<sub>3</sub>RR pathways at (a) pH = 0, (b) pH = 7, and (c) pH = 14.

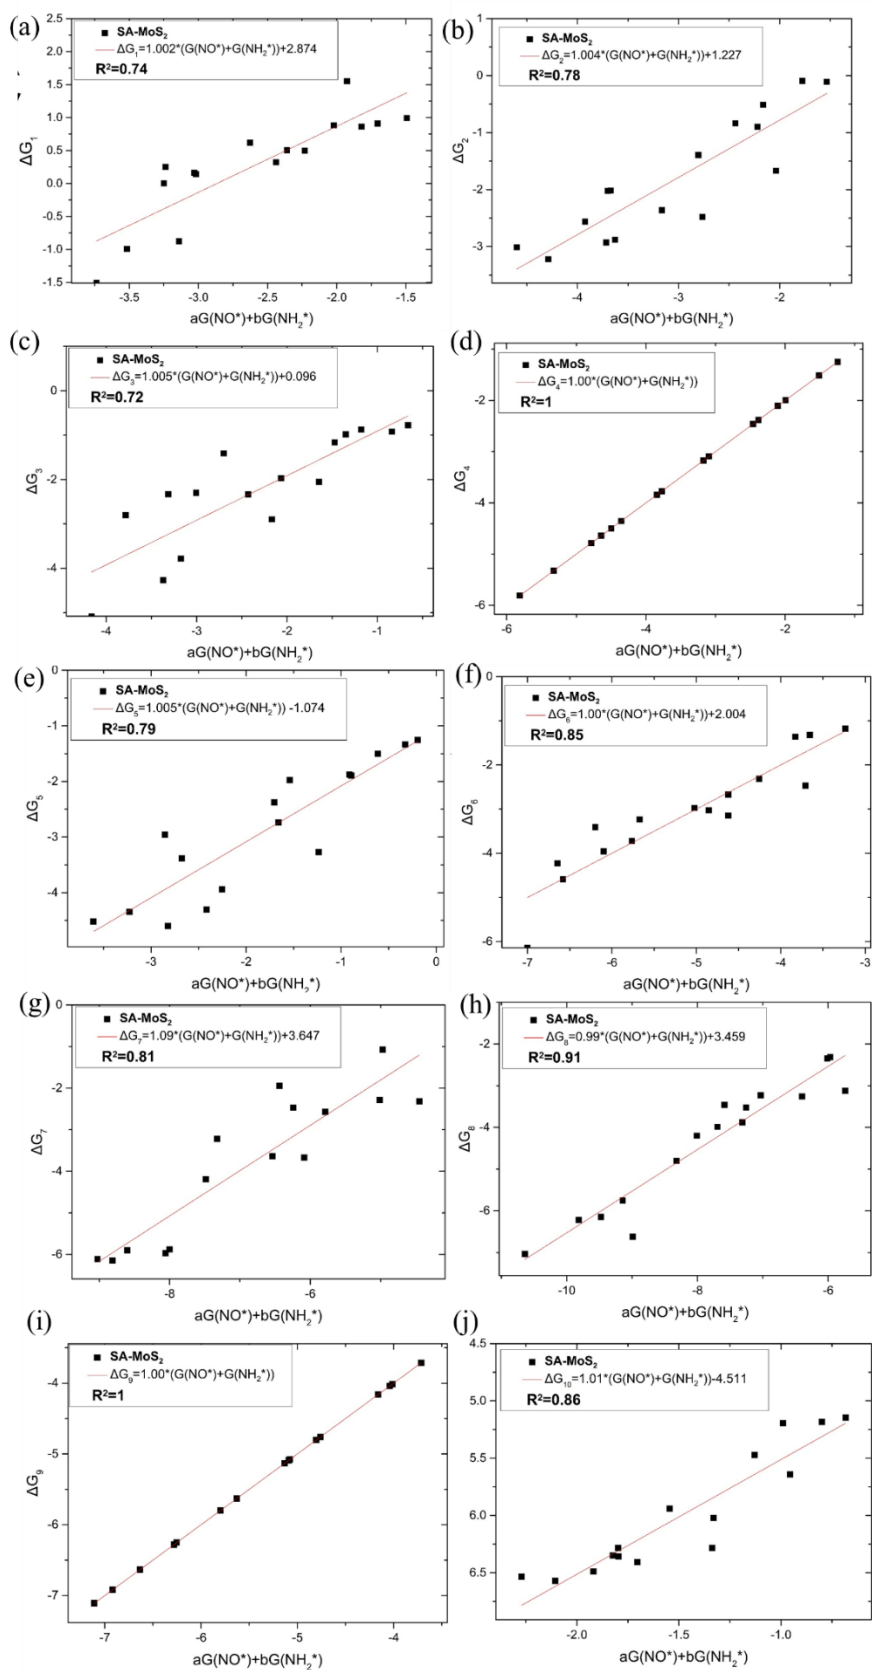

**Supplementary Figure 10.** The determined BEP scaling relations between ( $G_{\text{NO}^*}$ ,  $G_{\text{NH}_2^*}$ ) and  $\Delta G_{1-10}$  for the nitrate reduction process. The parameters of the linear fits are provided.

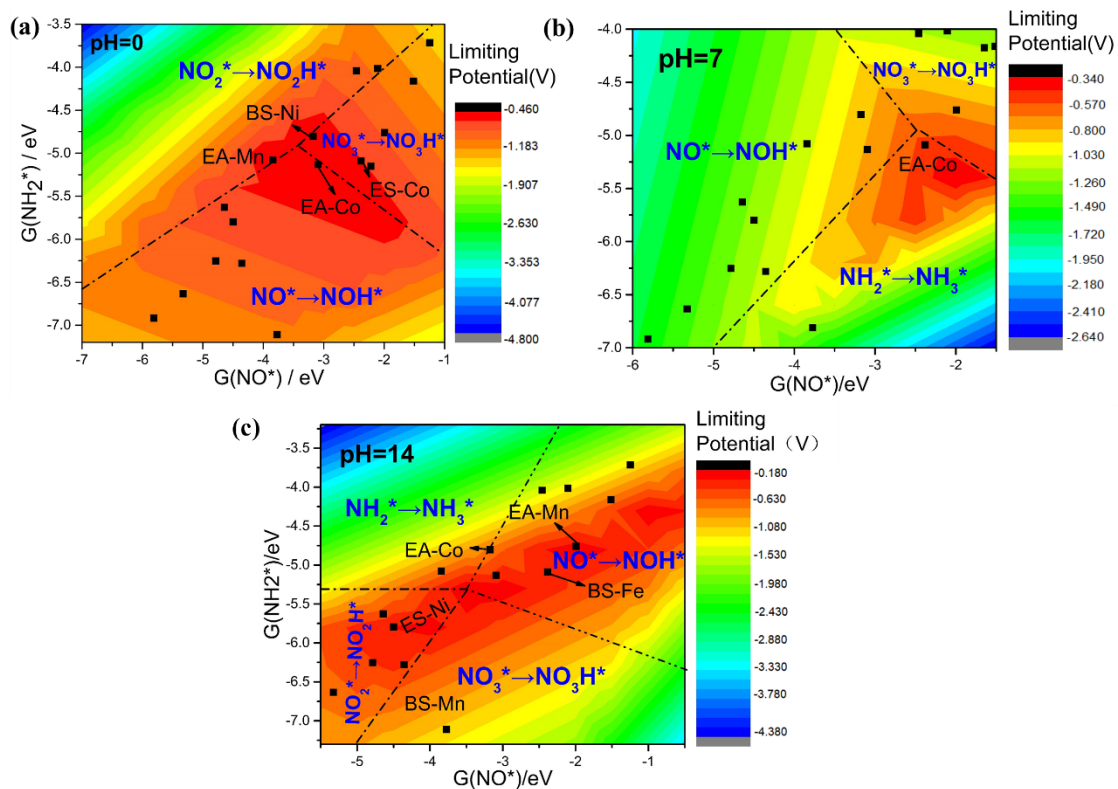

**Supplementary Figure 11.** Contour plot of limiting potential (v.s. RHE) as a function of the Gibbs adsorption free energy of  $\text{*NO}$  ( $G(\text{NO}^*)$ ) and  $\text{*NH}_2$  ( $G(\text{NH}_2^*)$ ) at (b) pH = 0, (c) pH = 7, and (d) pH = 14.

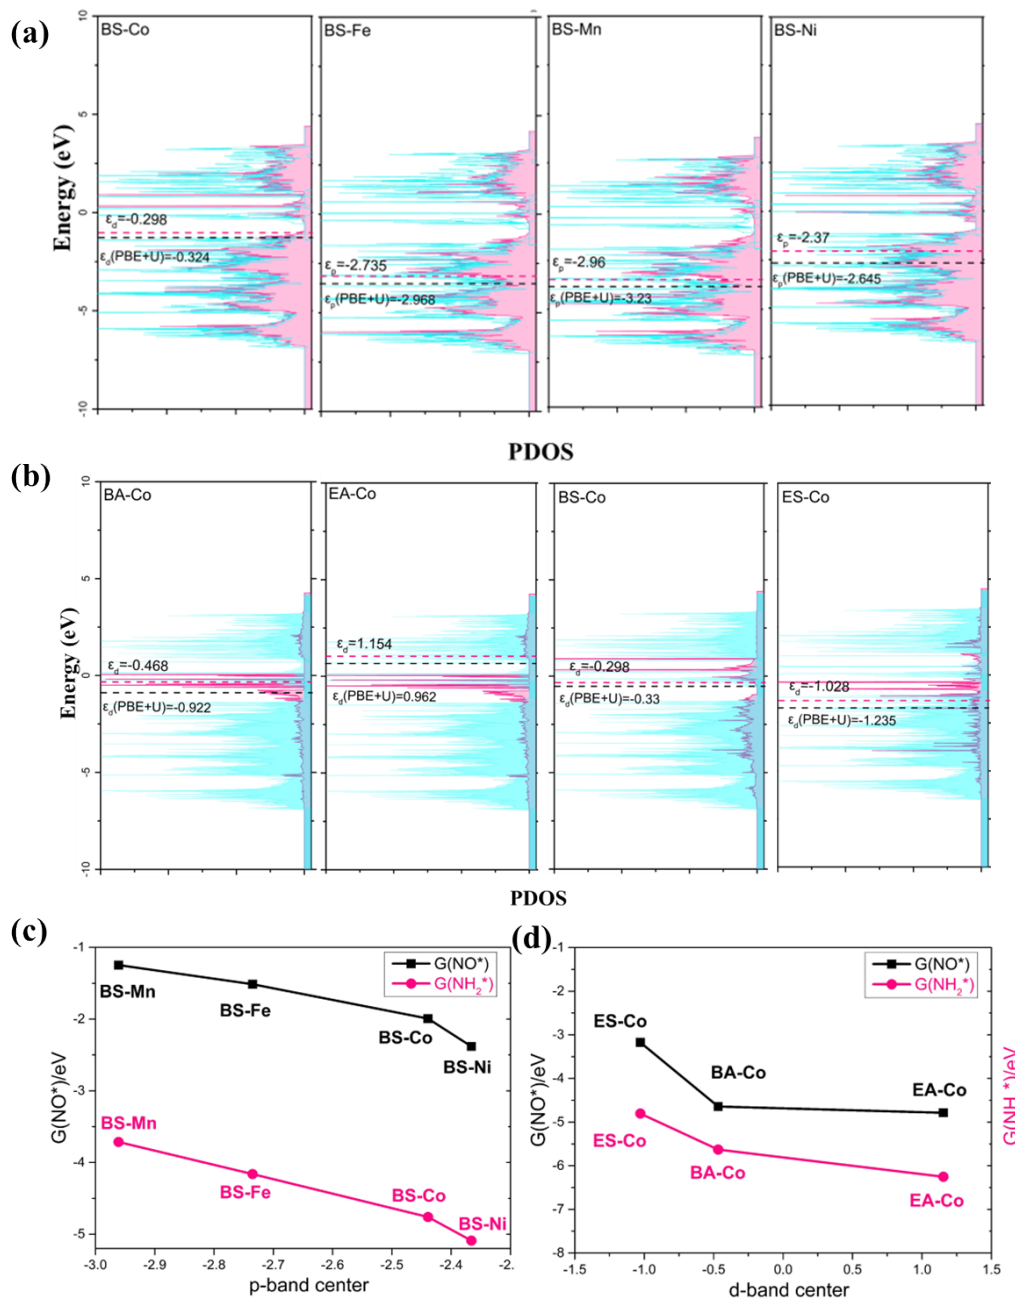

**Supplementary Figure 12.** a) The computed partial density of states (PDOS) of p-orbitals of S atom in BS-TM (TM=Fe, Co, Ni, Mn). b) The computed partial density of states (PDOS) of d-orbitals of Co atom in ES, BS, BA, EA-Co. c) Correlation between the p-band center of S atoms for BS-TM and  $G(\text{NO}^*)$ ,  $G(\text{NH}_2^*)$ . The computed partial density of states (PDOS) by PBE and PBE+U methods are depicted by pink and blue, respectively. d) Correlation between the d-band center of Co single atoms on diverse support sites and  $G(\text{NO}^*)$ ,  $G(\text{NH}_2^*)$ .

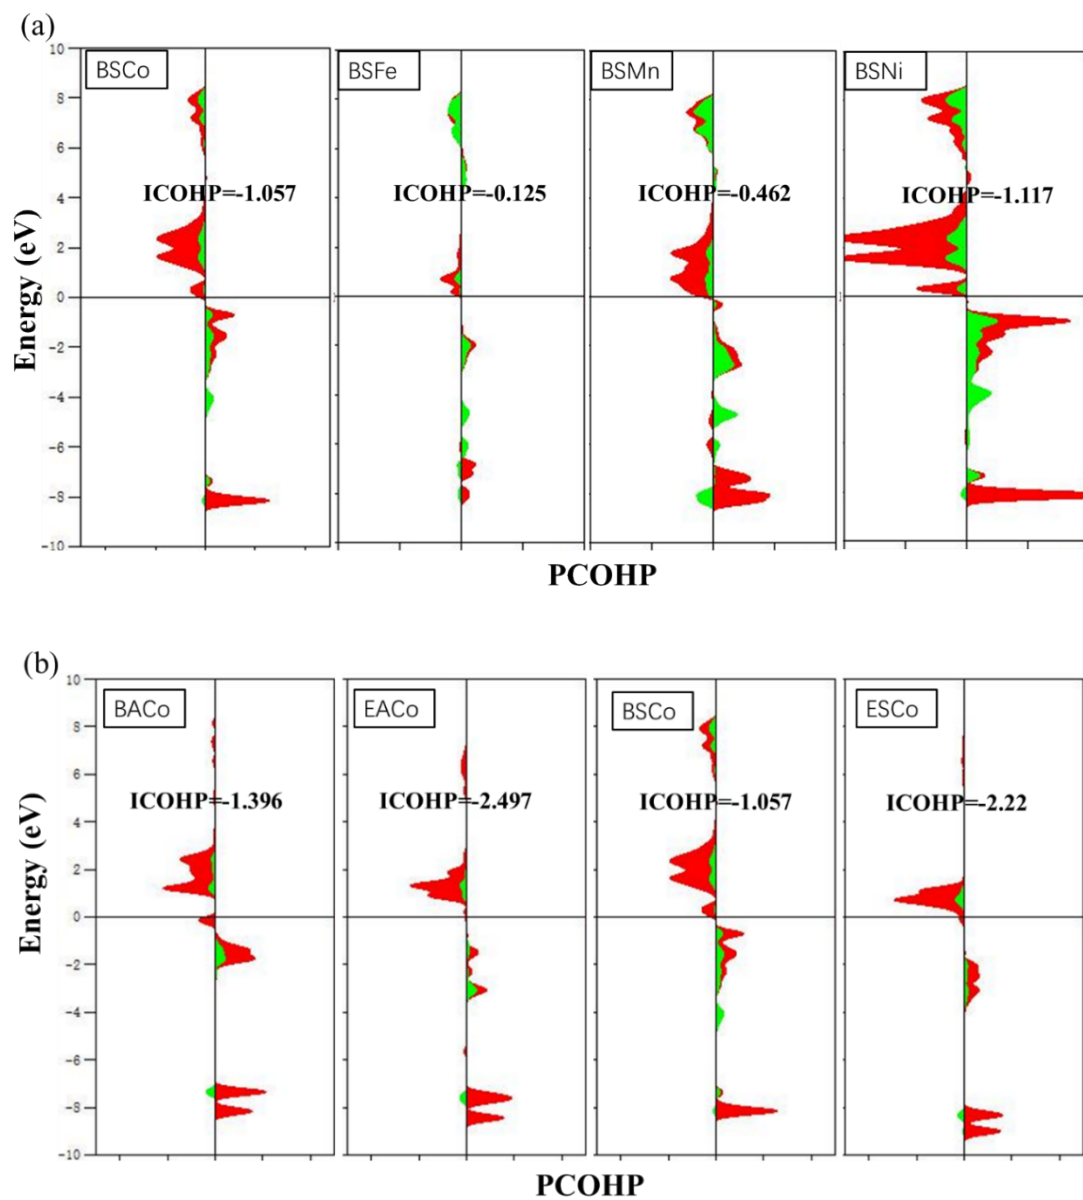

**Supplementary Figure 13.** The crystal orbital Hamilton populations (COHPs) of NO\* in BS-TM (TM=Fe, Co, Ni, Mn) and ES, BS, BA, EA-Co. The bonding contribution of N and O in COHP are depicted by red and green, respectively.



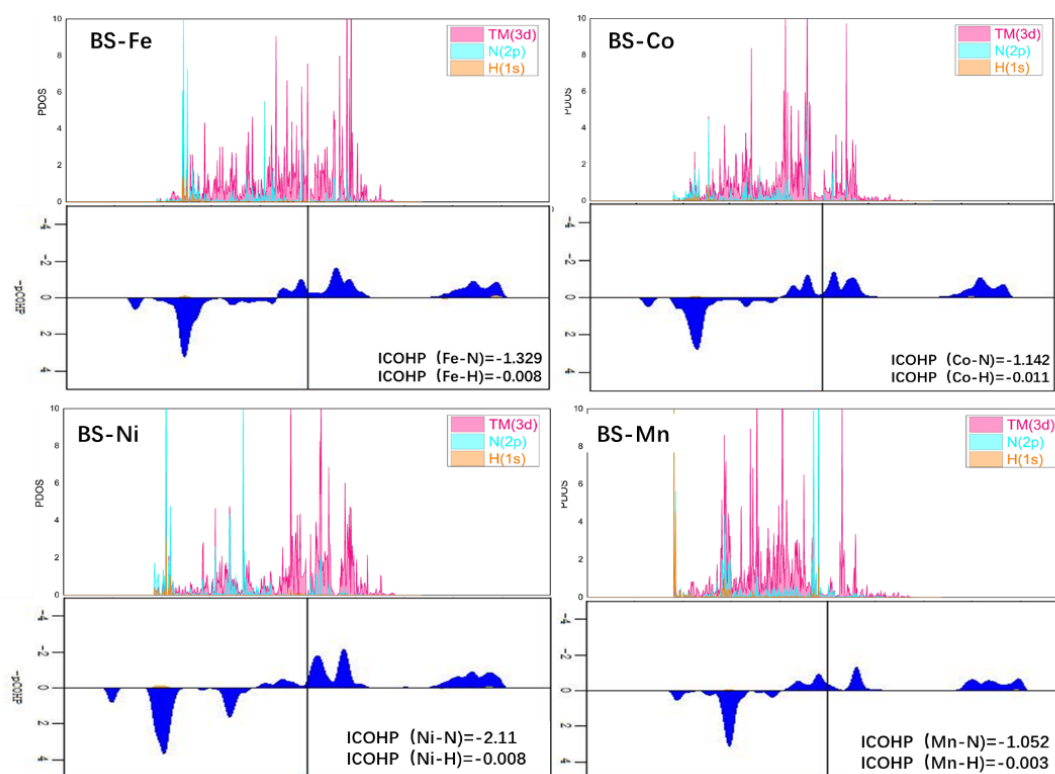

**Supplementary Figure 14.** The computed partial density of states (PDOS) and the crystal orbital Hamilton populations (COHPs) of  $\text{NH}_2^*$  in BS-TM (TM=Fe, Co, Ni, Mn). The bonding contribution of N and H in COHP are depicted by blue and orange, respectively.

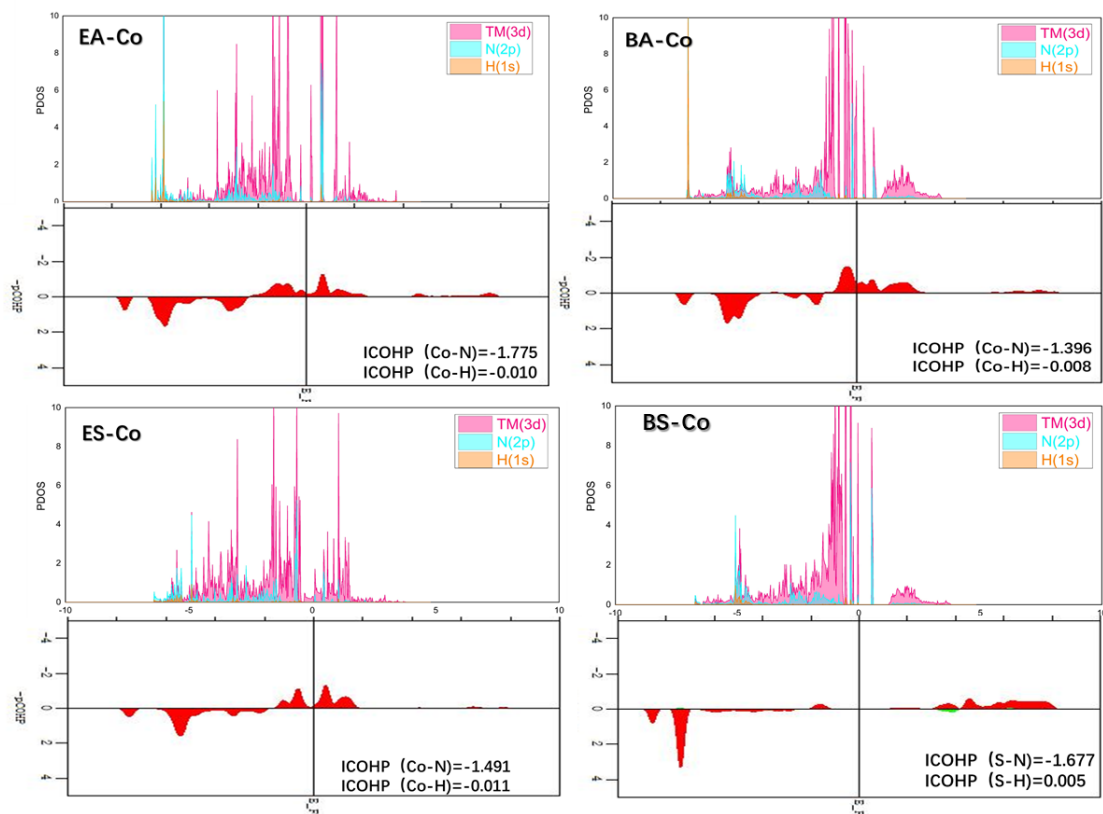

**Supplementary Figure 15.** The computed partial density of states (PDOS) and the crystal orbital Hamilton populations (COHPs) of  $\text{NH}_2^*$  in EA, BA, ES, BS-Co. The bonding contribution of N and H in COHP are depicted by red and green, respectively.

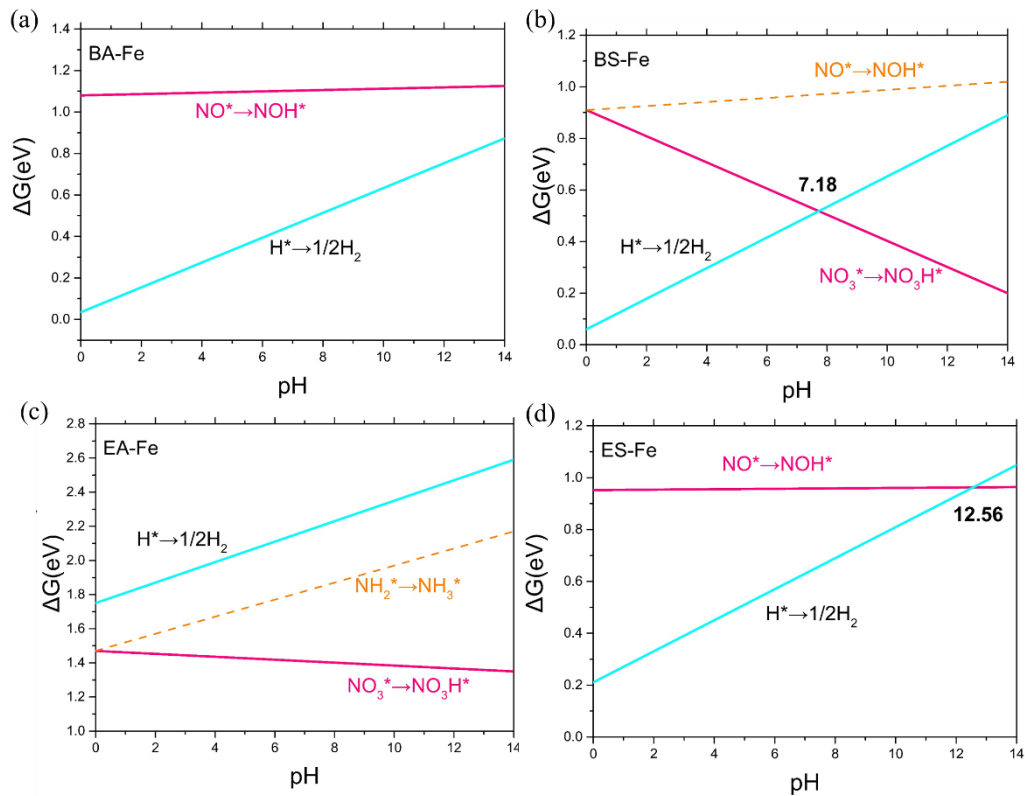

**Supplementary Figure 16.** Competing relationship between  $\text{NO}_3\text{RR}$  and HER on (a) BA-Fe, (b) BS-Fe, (c) EA-Fe and (d) ES-Fe.

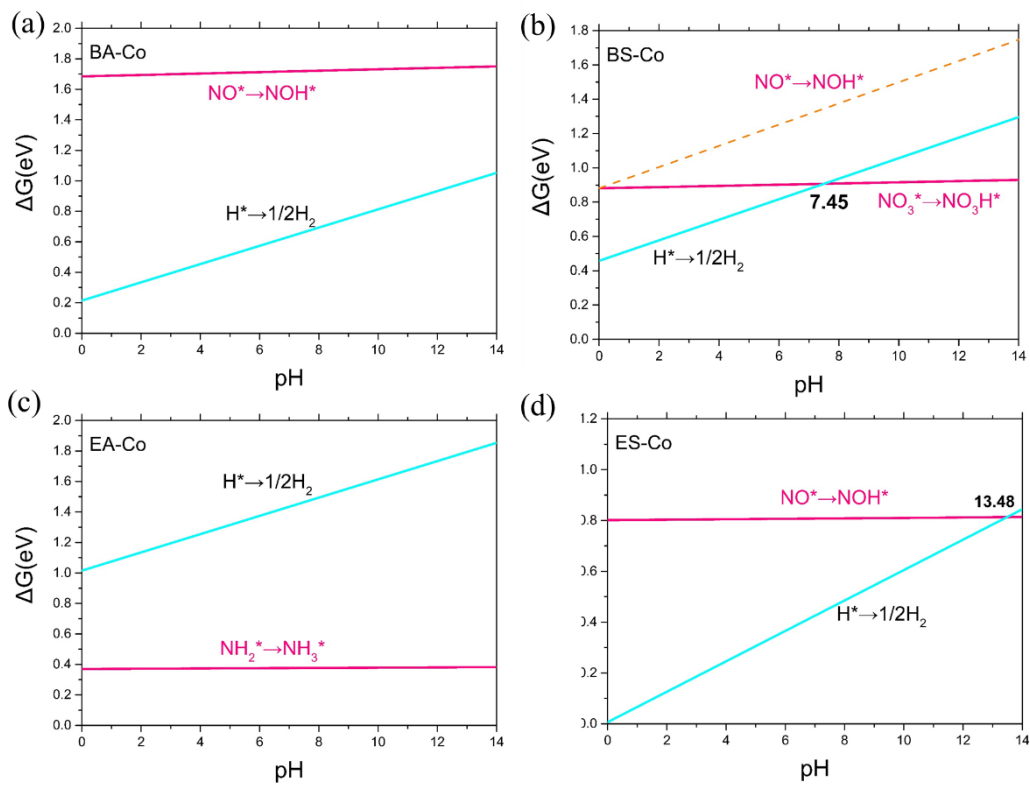

**Supplementary Figure 17.** Competing relationship between  $\text{NO}_3\text{RR}$  and HER on (a) BA-Co, (b) BS-Co, (c) EA-Co and (d) ES-Co.

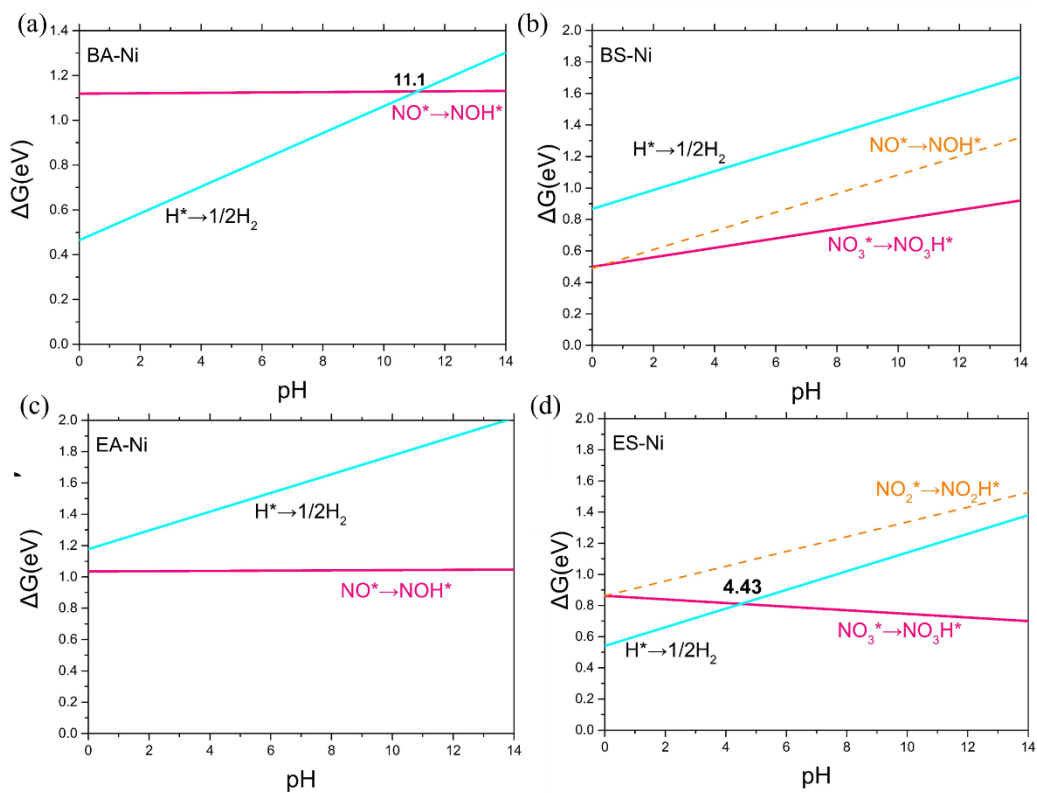

**Supplementary Figure 18.** Competing relationship between  $\text{NO}_3\text{RR}$  and HER on (a) BA-Ni, (b) BS-Ni, (c) EA-Ni and (d) ES-Ni.

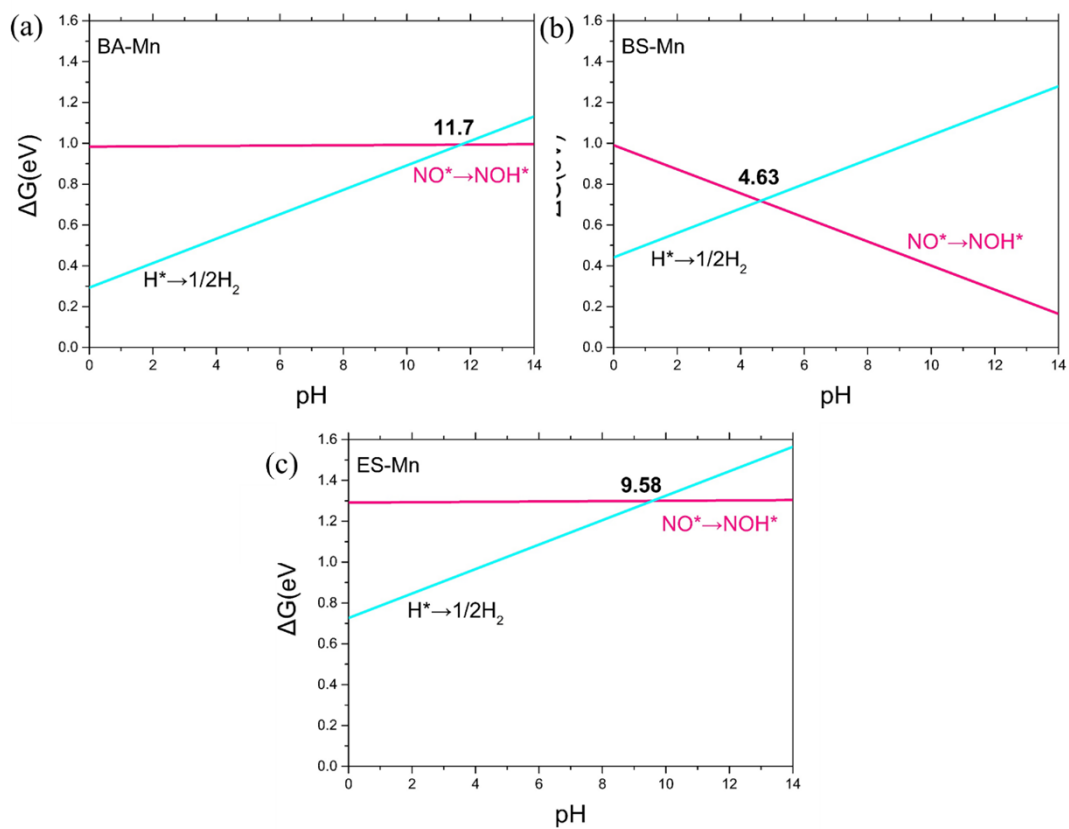

**Supplementary Figure 19.** Competing relationship between  $\text{NO}_3\text{RR}$  and HER on (a) BA-Mn, (b) BS-Mn, and (c) ES-Mn.

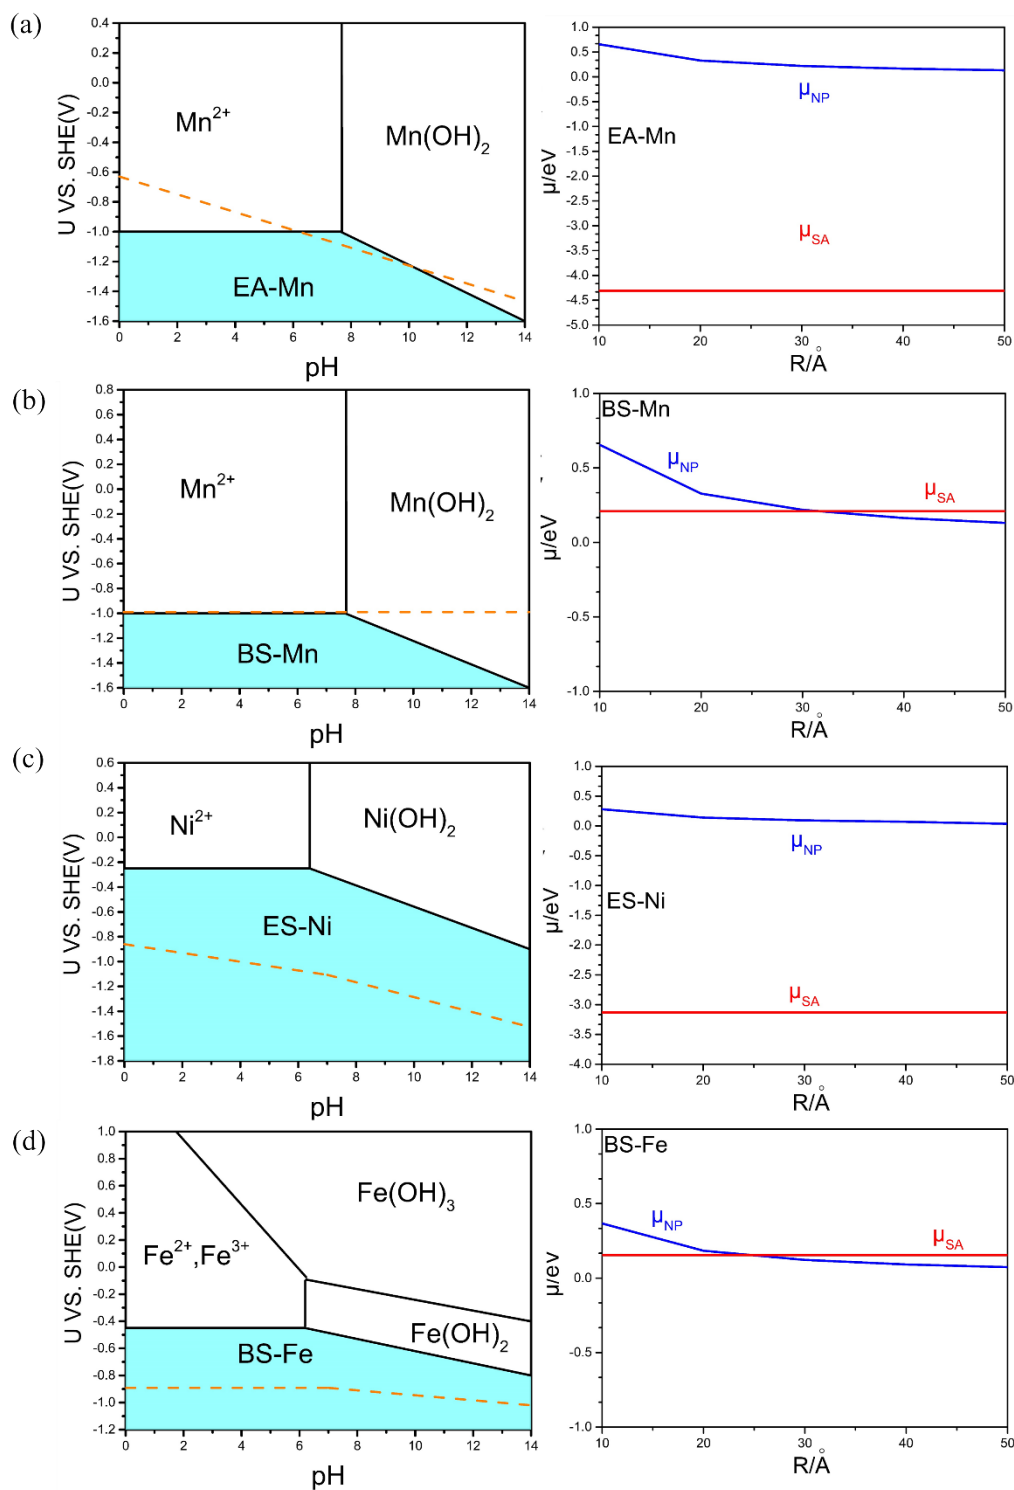

**Supplementary Figure 20.** Pourbaix diagram for the electrochemical dissolution process of SA-MoS<sub>2</sub>, at 25°C. The orange dotted line represents the limiting potential of SA-MoS<sub>2</sub> at different pH. Comparison between chemical potential of NPs,  $\mu_{NP}(R)$ , and that of SAs,  $\mu_{SA}$ , with respect to curvature of NPs. Black line,  $\mu_{NP}(R)$ ; colored lines,  $\mu_{SA}$  of SA-MoS<sub>2</sub>.

# PART III. Supplemental Tables

**Supplementary Table 1.** Formation energy of different substitution of TM-Basal MoS<sub>2</sub>.

| <b>Substitution Atom</b>      | <b>Mo</b> | <b>S</b> |
|-------------------------------|-----------|----------|
| <i>Fe-E<sub>form</sub>/eV</i> | 3.509     | 4.939    |
| <i>Co-E<sub>form</sub>/eV</i> | 4.139     | 4.373    |
| <i>Ni-E<sub>form</sub>/eV</i> | -2.213    | -0.254   |
| <i>Mn-E<sub>form</sub>/eV</i> | 2.363     | 5.322    |

**Supplementary Table 2.** Formation energy of different adsorption sites of TM-Basal MoS<sub>2</sub>.

| <b>Adsorption site</b>        | <b>Top-Mo</b> | <b>Top-S</b> | <b>Bridge-Mo</b> | <b>Bridge-S</b> |
|-------------------------------|---------------|--------------|------------------|-----------------|
| <i>Fe-E<sub>form</sub>/eV</i> | 3.123         | 4.069        | 7.459            | 3.304           |
| <i>Co-E<sub>form</sub>/eV</i> | 2.621         | 4.275        | 7.458            | 2.630           |
| <i>Ni-E<sub>form</sub>/eV</i> | 1.958         | 3.609        | 5.809            | 1.961           |
| <i>Mn-E<sub>form</sub>/eV</i> | 4.310         | 4.331        | 12.690           | 4.312           |

**Supplementary Table 3.** Formation energy of different S-coverage of TM-Edge MoS<sub>2</sub>.

| <b>S-Coverage</b>                         | <b>12.5%</b> | <b>25%</b> | <b>37.5%</b> | <b>50%</b> |
|-------------------------------------------|--------------|------------|--------------|------------|
| <i>Fe-E<sub>form</sub>/eV</i>             | -2.7093      | -5.5274    | -6.1308      | -8.3711    |
| <i>Co-E<sub>form</sub>/eV</i>             | -2.5667      | -2.7220    | -5.8470      | -6.4967    |
| <i>Co-E<sub>form</sub><br/>(PBE+U)/eV</i> | -1.3767      | -1.5239    | -4.6237      | -5.0468    |
| <i>Ni-E<sub>form</sub>/eV</i>             | -3.2107      | -3.8616    | -5.8078      | -6.2296    |
| <i>Mn-E<sub>form</sub>/eV</i>             | -3.1241      | -4.3467    | -6.0229      | -6.5569    |

**Supplementary Table 4.** The values of U-J parameters for PBE+U calculations

| <b>3d</b>  | <b>Mn</b> | <b>Fe</b> | <b>Co</b> | <b>Ni</b> |
|------------|-----------|-----------|-----------|-----------|
| <b>U-J</b> | 3.06      | 3.29      | 3.42      | 3.4       |

**Supplementary Table 5.** The adsorption energy of NO<sub>3</sub> and NO<sub>3</sub>H on SA-MoS<sub>2</sub>.

|              | <b><math>\Delta G(NO_3^*)/eV</math></b> | <b><math>\Delta G(NO_3H^*)/eV</math></b> |
|--------------|-----------------------------------------|------------------------------------------|
| <i>BA-Fe</i> | 0.182                                   | 0.164                                    |
| <i>BS-Fe</i> | 1.020                                   | 0.910                                    |
| <i>EA-Fe</i> | 1.623                                   | 1.551                                    |
| <i>ES-Fe</i> | 0.784                                   | 0.620                                    |
| <i>BA-Co</i> | 0.149                                   | 0.142                                    |
| <i>BS-Co</i> | 0.991                                   | 0.881                                    |
| <i>EA-Co</i> | 0.113                                   | 0.001                                    |
| <i>ES-Co</i> | 0.623                                   | 0.505                                    |
| <i>BA-Ni</i> | 0.565                                   | 0.322                                    |
| <i>BS-Ni</i> | 0.692                                   | 0.499                                    |

|              |        |        |
|--------------|--------|--------|
| <i>EA-Ni</i> | 0.369  | 0.251  |
| <i>ES-Ni</i> | 0.986  | 0.863  |
| <i>BA-Mn</i> | -0.684 | -0.991 |
| <i>BS-Mn</i> | 1.201  | 0.991  |
| <i>EA-Mn</i> | -0.528 | -0.876 |
| <i>ES-Mn</i> | -0.944 | -1.510 |

**Supplementary Table 6.** Computed adsorption energies, zero-point energies and entropy of reaction intermediates on Fe.

| <i>Reaction Intermediates</i>       | <i>BA-Fe</i>                |                 |                | <i>BS-Fe</i>                |                 |                | <i>EA-Fe</i>                |                 |                | <i>ES-Fe</i>                |                 |                |
|-------------------------------------|-----------------------------|-----------------|----------------|-----------------------------|-----------------|----------------|-----------------------------|-----------------|----------------|-----------------------------|-----------------|----------------|
|                                     | <i>E<sub>ads</sub></i> (eV) | <i>ZPE</i> (eV) | <i>TS</i> (eV) | <i>E<sub>ads</sub></i> (eV) | <i>ZPE</i> (eV) | <i>TS</i> (eV) | <i>E<sub>ads</sub></i> (eV) | <i>ZPE</i> (eV) | <i>TS</i> (eV) | <i>E<sub>ads</sub></i> (eV) | <i>ZPE</i> (eV) | <i>TS</i> (eV) |
| <i>*NO<sub>3</sub>H</i>             | 0.164                       | 0.685           | 0.201          | 0.910                       | 0.700           | 0.275          | 1.472                       | 0.660           | 0.263          | 0.620                       | 0.700           | 0.271          |
| <i>NO<sub>2</sub>*</i>              | -2.020                      | 0.266           | 0.200          | -0.094                      | 0.256           | 0.223          | -0.978                      | 0.253           | 0.230          | -2.458                      | 0.274           | 0.166          |
| <i>O<sub>2</sub>N*</i>              | -1.900                      | 0.412           | 0.184          | -0.082                      | 0.443           | 0.146          | -0.923                      | 0.376           | 0.163          | -2.361                      | 0.389           | 0.152          |
| <i>*NO<sub>2</sub>H</i>             | -3.738                      | 0.512           | 0.215          | -0.920                      | 0.545           | 0.302          | -2.132                      | 0.594           | 0.189          | -1.410                      | 0.535           | 0.234          |
| <i>*NO<sub>2</sub>H<sub>2</sub></i> | -4.200                      | 0.845           | 0.196          | -1.400                      | 0.865           | 0.200          | -2.633                      | 0.823           | 0.187          | -1.980                      | 0.869           | 0.223          |
| <i>NO*</i>                          | -4.498                      | 0.200           | 0.149          | -1.513                      | 0.223           | 0.152          | -2.538                      | 0.214           | 0.135          | -3.843                      | 0.216           | 0.126          |
| <i>ON*</i>                          | -4.472                      | 0.132           | 0.167          | -1.421                      | 0.139           | 0.188          | -2.487                      | 0.141           | 0.145          | -3.565                      | 0.136           | 0.158          |
| <i>N*O*</i>                         | -4.465                      | 0.167           | 0.195          | -1.324                      | 0.168           | 0.186          | -2.332                      | 0.170           | 0.191          | -3.262                      | 0.169           | 0.210          |
| <i>*NOH</i>                         | -3.385                      | 0.455           | 0.206          | -1.335                      | 0.414           | 0.260          | -3.352                      | 0.475           | 0.150          | -3.941                      | 0.512           | 0.089          |
| <i>*NHOH</i>                        | -3.721                      | 0.531           | 0.074          | -1.321                      | 0.792           | 0.133          | -1.362                      | 0.785           | 0.168          | -2.975                      | 0.777           | 0.133          |
| <i>*N</i>                           | -4.193                      | 0.085           | 0.054          | -2.289                      | 0.086           | 0.056          | -3.731                      | 0.083           | 0.051          | -3.640                      | 0.085           | 0.058          |
| <i>*NH</i>                          | -4.801                      | 0.353           | 0.073          | -3.258                      | 0.372           | 0.069          | -2.392                      | 0.337           | 0.093          | -3.881                      | 0.304           | 0.069          |
| <i>*NH<sub>2</sub></i>              | -5.798                      | 0.643           | 0.078          | -4.161                      | 0.698           | 0.090          | -4.120                      | 0.663           | 0.117          | -5.079                      | 0.658           | 0.126          |
| <i>*NH<sub>3</sub></i>              | -6.358                      | 1.011           | 0.186          | -5.184                      | 0.944           | 0.279          | -4.067                      | 1.027           | 0.155          | -5.940                      | 1.035           | 0.137          |
| <i>*NH<sub>4</sub><sup>+</sup></i>  | -4.152                      | 2.502           | 1.925          | -4.188                      | 2.609           | 1.896          | -3.412                      | 2.421           | 2.202          | -5.323                      | 2.532           | 2.001          |

**Supplementary Table 7.** Computed adsorption energies, zero-point energies and entropy of reaction intermediates on Co.

| <i>Reaction Intermediates</i>       | <i>BA-Co</i>                |                 |                | <i>BS-Co</i>                |                 |                | <i>EA-Co</i>                |                 |                | <i>ES-Co</i>                |                 |                |
|-------------------------------------|-----------------------------|-----------------|----------------|-----------------------------|-----------------|----------------|-----------------------------|-----------------|----------------|-----------------------------|-----------------|----------------|
|                                     | <i>E<sub>ads</sub></i> (eV) | <i>ZPE</i> (eV) | <i>TS</i> (eV) | <i>E<sub>ads</sub></i> (eV) | <i>ZPE</i> (eV) | <i>TS</i> (eV) | <i>E<sub>ads</sub></i> (eV) | <i>ZPE</i> (eV) | <i>TS</i> (eV) | <i>E<sub>ads</sub></i> (eV) | <i>ZPE</i> (eV) | <i>TS</i> (eV) |
| <i>*NO<sub>3</sub>H</i>             | 0.142                       | 0.697           | 0.258          | 0.881                       | 0.700           | 0.272          | 0.000                       | 0.696           | 0.246          | 0.863                       | 0.704           | 0.250          |
| <i>NO<sub>2</sub>*</i>              | -2.023                      | 0.285           | 0.153          | -0.515                      | 0.300           | 0.227          | -2.564                      | 0.286           | 0.193          | -1.670                      | 0.294           | 0.155          |
| <i>O<sub>2</sub>N*</i>              | -1.968                      | 0.412           | 0.184          | -0.441                      | 0.443           | 0.146          | -2.382                      | 0.376           | 0.163          | -1.994                      | 0.389           | 0.152          |
| <i>*NO<sub>2</sub>H</i>             | -2.330                      | 0.569           | 0.261          | -0.875                      | 0.534           | 0.256          | -4.267                      | 0.581           | 0.251          | -0.982                      | 0.581           | 0.209          |
| <i>*NO<sub>2</sub>H<sub>2</sub></i> | -2.966                      | 0.845           | 0.196          | -1.369                      | 0.865           | 0.200          | -4.779                      | 0.823           | 0.187          | -1.365                      | 0.869           | 0.223          |
| <i>NO*</i>                          | -4.642                      | 0.204           | 0.151          | -1.993                      | 0.200           | 0.174          | -4.785                      | 0.194           | 0.158          | -2.104                      | 0.195           | 0.092          |
| <i>ON*</i>                          | -4.232                      | 0.132           | 0.167          | -1.758                      | 0.139           | 0.188          | -4.552                      | 0.141           | 0.145          | -1.951                      | 0.136           | 0.158          |
| <i>N*O*</i>                         | -4.441                      | 0.167           | 0.195          | -1.748                      | 0.168           | 0.186          | -4.647                      | 0.170           | 0.191          | -2.001                      | 0.169           | 0.210          |
| <i>*NOH</i>                         | -2.958                      | 0.452           | 0.198          | -1.503                      | 0.450           | 0.166          | -4.597                      | 0.484           | 0.139          | -1.877                      | 0.471           | 0.114          |
| <i>*NHOH</i>                        | -3.235                      | 0.755           | 0.178          | -2.315                      | 0.792           | 0.133          | -3.410                      | 0.785           | 0.168          | -2.470                      | 0.777           | 0.133          |
| <i>*N</i>                           | -3.220                      | 0.085           | 0.054          | -2.572                      | 0.086           | 0.056          | -5.970                      | 0.093           | 0.035          | -1.075                      | 0.086           | 0.045          |



|                               |        |       |       |        |       |       |        |       |       |        |       |       |
|-------------------------------|--------|-------|-------|--------|-------|-------|--------|-------|-------|--------|-------|-------|
| *NH                           | -4.198 | 0.300 | 0.033 | -3.520 | 0.358 | 0.084 | -6.623 | 0.378 | 0.058 | -2.345 | 0.287 | 0.091 |
| *NH <sub>2</sub>              | -5.629 | 0.644 | 0.088 | -4.760 | 0.701 | 0.091 | -6.253 | 0.666 | 0.120 | -4.015 | 0.618 | 0.077 |
| *NH <sub>3</sub>              | -6.348 | 1.023 | 0.185 | -5.196 | 0.938 | 0.228 | -6.489 | 1.033 | 0.165 | -5.640 | 1.040 | 0.131 |
| *NH <sub>4</sub> <sup>+</sup> | -3.902 | 2.563 | 1.837 | -4.770 | 2.597 | 1.874 | -6.247 | 2.681 | 2.200 | -3.716 | 2.558 | 1.967 |

**Supplementary Table 8.** Computed adsorption energies, zero-point energies and entropy of reaction intermediates on Ni.

| Reaction Intermediates          | BA-Ni                 |         |        | BS-Ni                 |         |        | EA-Ni                 |         |        | ES-Ni                 |         |        |
|---------------------------------|-----------------------|---------|--------|-----------------------|---------|--------|-----------------------|---------|--------|-----------------------|---------|--------|
|                                 | E <sub>ads</sub> (eV) | ZPE(eV) | TS(eV) |
| *NO <sub>3</sub> H              | 0.322                 | 0.703   | 0.261  | 0.499                 | 0.701   | 0.337  | 0.251                 | 0.705   | 0.258  | 0.863                 | 0.693   | 0.213  |
| NO <sub>2</sub> *               | -1.395                | 0.273   | 0.199  | -0.836                | 0.306   | 0.219  | -2.881                | 0.286   | 0.193  | -1.670                | 0.294   | 0.161  |
| O <sub>2</sub> N*               | -1.330                | 0.412   | 0.184  | -0.668                | 0.443   | 0.146  | -2.632                | 0.376   | 0.163  | -1.232                | 0.389   | 0.152  |
| *NO <sub>2</sub> H              | -1.969                | 0.573   | 0.202  | -1.165                | 0.533   | 0.196  | -2.336                | 0.581   | 0.251  | -0.982                | 0.575   | 0.203  |
| *NO <sub>2</sub> H <sub>2</sub> | -2.359                | 0.845   | 0.196  | -1.665                | 0.865   | 0.200  | -2.669                | 0.823   | 0.187  | -1.331                | 0.869   | 0.223  |
| NO*                             | -3.094                | 0.176   | 0.168  | -2.382                | 0.166   | 0.189  | -3.773                | 0.194   | 0.158  | -2.105                | 0.164   | 0.183  |
| ON*                             | -2.787                | 0.132   | 0.167  | -2.221                | 0.139   | 0.188  | -3.520                | 0.141   | 0.145  | -1.998                | 0.136   | 0.158  |
| N*O*                            | -2.889                | 0.167   | 0.195  | -2.332                | 0.168   | 0.186  | -3.002                | 0.170   | 0.191  | -2.014                | 0.169   | 0.210  |
| *NOH                            | -1.975                | 0.461   | 0.193  | -1.895                | 0.455   | 0.156  | -2.738                | 0.463   | 0.185  | -1.877                | 0.465   | 0.140  |
| *NHOH                           | -3.023                | 0.775   | 0.163  | -2.672                | 0.796   | 0.128  | -4.591                | 0.780   | 0.145  | -2.470                | 0.787   | 0.139  |
| *N                              | -1.944                | 0.080   | 0.077  | -2.471                | 0.085   | 0.057  | -6.147                | 0.078   | 0.051  | -1.075                | 0.082   | 0.063  |
| *NH                             | -3.459                | 0.272   | 0.071  | -3.986                | 0.362   | 0.079  | -7.032                | 0.377   | 0.057  | -3.345                | 0.300   | 0.075  |
| *NH <sub>2</sub>                | -5.132                | 0.638   | 0.164  | -5.090                | 0.696   | 0.111  | -7.110                | 0.666   | 0.120  | -4.015                | 0.643   | 0.092  |
| *NH <sub>3</sub>                | -6.293                | 1.024   | 0.186  | -5.471                | 0.931   | 0.121  | -6.408                | 1.033   | 0.165  | -5.640                | 1.024   | 0.150  |
| *NH <sub>4</sub> <sup>+</sup>   | -3.798                | 2.613   | 1.932  | -5.161                | 2.595   | 1.918  | -6.405                | 2.681   | 2.200  | -3.716                | 2.406   | 2.137  |

**Supplementary Table 9.** Computed adsorption energies, zero-point energies and entropy of reaction intermediates on Mn.

| Reaction Intermediates          | BA-Mn                 |         |        | BS-Mn                 |         |        | EA-Mn                 |         |        | ES-Mn                 |         |        |
|---------------------------------|-----------------------|---------|--------|-----------------------|---------|--------|-----------------------|---------|--------|-----------------------|---------|--------|
|                                 | E <sub>ads</sub> (eV) | ZPE(eV) | TS(eV) |
| *NO <sub>3</sub> H              | -0.991                | 0.707   | 0.304  | 0.991                 | 0.695   | 0.216  | -0.876                | 0.658   | 0.259  | -1.510                | 0.656   | 0.290  |
| NO <sub>2</sub> *               | -3.221                | 0.272   | 0.221  | -0.109                | 0.256   | 0.231  | -2.929                | 0.290   | 0.183  | -3.014                | 0.286   | 0.171  |
| O <sub>2</sub> N*               | -2.987                | 0.412   | 0.184  | 0.002                 | 0.443   | 0.146  | -2.668                | 0.376   | 0.163  | -2.875                | 0.389   | 0.152  |
| *NO <sub>2</sub> H              | -2.806                | 0.568   | 0.271  | -0.775                | 0.534   | 0.141  | -2.300                | 0.556   | 0.262  | -5.082                | 0.669   | 0.315  |
| *NO <sub>2</sub> H <sub>2</sub> | -3.112                | 0.845   | 0.196  | -1.023                | 0.865   | 0.200  | -2.600                | 0.823   | 0.187  | -5.368                | 0.869   | 0.223  |
| NO*                             | -5.325                | 0.196   | 0.156  | -1.247                | 0.144   | 0.181  | -4.354                | 0.195   | 0.095  | -5.811                | 0.215   | 0.127  |
| ON*                             | -4.789                | 0.132   | 0.167  | -1.023                | 0.139   | 0.188  | -4.011                | 0.141   | 0.145  | -5.623                | 0.136   | 0.158  |
| N*O*                            | -4.997                | 0.167   | 0.195  | -1.234                | 0.168   | 0.186  | -4.204                | 0.170   | 0.191  | -5.741                | 0.169   | 0.210  |
| *NOH                            | -4.342                | 0.507   | 0.159  | -1.255                | 0.394   | 0.168  | -4.302                | 0.471   | 0.170  | -4.519                | 0.464   | 0.140  |
| *NHOH                           | -4.228                | 0.775   | 0.163  | -1.178                | 0.796   | 0.128  | -3.955                | 0.780   | 0.145  | -6.143                | 0.730   | 0.155  |
| *N                              | -5.901                | 0.080   | 0.077  | -2.322                | 0.085   | 0.057  | -5.880                | 0.078   | 0.051  | -6.117                | 0.082   | 0.063  |
| *NH                             | -6.151                | 0.338   | 0.112  | -3.117                | 0.366   | 0.077  | -5.753                | 0.358   | 0.093  | -6.219                | 0.345   | 0.096  |

|                               |        |       |       |        |       |       |        |       |       |        |       |       |
|-------------------------------|--------|-------|-------|--------|-------|-------|--------|-------|-------|--------|-------|-------|
| *NH <sub>2</sub>              | -6.635 | 0.666 | 0.122 | -3.715 | 0.680 | 0.072 | -6.281 | 0.667 | 0.113 | -6.918 | 0.681 | 0.107 |
| *NH <sub>3</sub>              | -6.573 | 1.021 | 0.189 | -5.145 | 0.915 | 0.126 | -6.283 | 1.108 | 0.121 | -6.534 | 1.107 | 0.109 |
| *NH <sub>4</sub> <sup>+</sup> | -6.425 | 2.649 | 1.919 | -0.167 | 2.595 | 1.918 | -6.188 | 2.496 | 2.112 | -7.519 | 2.498 | 1.900 |

**Supplementary Table 10.** Calculated Gibbs free energies change of elementary step in NO<sub>3</sub>RR on BA-Fe at different pH.

|                                                 | <i>pH=0</i> | <i>pH=7</i> | <i>pH=14</i> |
|-------------------------------------------------|-------------|-------------|--------------|
| *→*NO <sub>3</sub> H                            | 0.164       | 0.164       | 0.164        |
| *NO <sub>3</sub> H→O <sub>2</sub> N*            | -2.184      | -1.765      | -1.346       |
| O <sub>2</sub> N*→*NO <sub>2</sub> H            | -1.762      | -1.343      | -0.924       |
| *NO <sub>2</sub> H→ON*                          | -0.716      | -0.297      | 0.122        |
| ON*→*NOH                                        | 1.113       | 1.532       | 1.951        |
| *NOH→*NHOH                                      | -0.337      | 0.083       | 0.502        |
| *NHOH→*NH                                       | -1.080      | -0.660      | -0.241       |
| *NH→*NH <sub>2</sub>                            | -0.997      | -0.578      | -0.159       |
| *NH <sub>2</sub> →*NH <sub>3</sub>              | -0.560      | -0.141      | 0.278        |
| *NH <sub>3</sub> →*NH <sub>4</sub> <sup>+</sup> | 2.201       | 2.201       | /            |

**Supplementary Table 11.** Calculated Gibbs free energies change of elementary step in NO<sub>3</sub>RR on BS-Fe at different pH.

|                                                 | <i>pH=0</i> | <i>pH=7</i> | <i>pH=14</i> |
|-------------------------------------------------|-------------|-------------|--------------|
| *→*NO <sub>3</sub> H                            | 0.910       | 0.910       | 0.910        |
| *NO <sub>3</sub> H→O <sub>2</sub> N*            | -1.004      | -0.585      | -0.166       |
| O <sub>2</sub> N*→*NO <sub>2</sub> H            | -0.825      | -0.406      | 0.013        |
| *NO <sub>2</sub> H→ON*                          | -0.594      | -0.175      | 0.244        |
| ON*→*NOH                                        | 0.179       | 0.598       | 1.017        |
| *NOH→*NHOH                                      | -0.954      | -0.535      | -0.116       |
| *NHOH→*NH                                       | -0.969      | -0.550      | -0.131       |
| *NH→*NH <sub>2</sub>                            | -0.903      | -0.484      | -0.065       |
| *NH <sub>2</sub> →*NH <sub>3</sub>              | -1.023      | -0.604      | -0.185       |
| *NH <sub>3</sub> →*NH <sub>4</sub> <sup>+</sup> | 0.996       | 0.996       | /            |

**Supplementary Table 12.** Calculated Gibbs free energies change of elementary step in NO<sub>3</sub>RR on EA-Fe at different pH.

|                                                 | <i>pH=0</i> | <i>pH=7</i> | <i>pH=14</i> |
|-------------------------------------------------|-------------|-------------|--------------|
| *→*NO <sub>3</sub> H                            | 1.472       | 1.472       | 1.472        |
| *NO <sub>3</sub> H→O <sub>2</sub> N*            | -2.449      | -2.030      | -1.611       |
| O <sub>2</sub> N*→*NO <sub>2</sub> H            | -1.154      | -0.735      | -0.316       |
| *NO <sub>2</sub> H→ON*                          | -0.407      | 0.012       | 0.413        |
| ON*→*NOH                                        | -0.814      | -0.395      | 0.024        |
| *NOH→*NHOH                                      | -0.378      | 0.041       | 0.460        |
| *NHOH→*NH                                       | 1.339       | 1.758       | 2.177        |
| *NH→*NH <sub>2</sub>                            | -1.729      | -1.310      | -0.891       |
| *NH <sub>2</sub> →*NH <sub>3</sub>              | 0.053       | 0.472       | 0.891        |
| *NH <sub>3</sub> →*NH <sub>4</sub> <sup>+</sup> | 0.655       | 0.655       | /            |

**Supplementary Table 13.** Calculated Gibbs free energies change of elementary step in NO<sub>3</sub>RR on ES-Fe at different pH.

|                                                 | <i>pH=0</i> | <i>pH=7</i> | <i>pH=14</i> |
|-------------------------------------------------|-------------|-------------|--------------|
| *→*NO <sub>3</sub> H                            | 0.620       | 0.620       | 0.620        |
| *NO <sub>3</sub> H→O <sub>2</sub> N*            | -2.981      | -2.562      | -2.143       |
| O <sub>2</sub> N*→*NO <sub>2</sub> H            | 0.952       | 1.371       | 1.790        |
| *NO <sub>2</sub> H→ON*                          | -2.433      | -2.014      | -1.595       |
| ON*→*NOH                                        | -0.098      | 0.321       | 0.740        |
| *NOH→*NHOH                                      | 0.301       | 0.720       | 1.139        |
| *NHOH→*NH                                       | -0.241      | 0.178       | 0.597        |
| *NH→*NH <sub>2</sub>                            | -1.198      | -0.779      | -0.360       |
| *NH <sub>2</sub> →*NH <sub>3</sub>              | -0.861      | -0.442      | -0.023       |
| *NH <sub>3</sub> →*NH <sub>4</sub> <sup>+</sup> | 0.617       | 0.617       | /            |

**Supplementary Table 14.** Calculated Gibbs free energies change of elementary step in NO<sub>3</sub>RR on BA-Co at different pH.

|                                                 | <i>pH=0</i> | <i>pH=7</i> | <i>pH=14</i> |
|-------------------------------------------------|-------------|-------------|--------------|
| *→*NO <sub>3</sub> H                            | 0.142       | 0.142       | 0.142        |
| *NO <sub>3</sub> H→O <sub>2</sub> N*            | -2.165      | -1.746      | -1.327       |
| O <sub>2</sub> N*→*NO <sub>2</sub> H            | -0.307      | 0.112       | 0.531        |
| *NO <sub>2</sub> H→ON*                          | -2.312      | -1.893      | -1.474       |
| ON*→*NOH                                        | 1.684       | 2.103       | 2.522        |
| *NOH→*NHOH                                      | -0.277      | 0.142       | 0.561        |
| *NHOH→*NH                                       | -0.964      | -0.545      | -0.126       |
| *NH→*NH <sub>2</sub>                            | -1.431      | -1.012      | -0.593       |
| *NH <sub>2</sub> →*NH <sub>3</sub>              | -0.719      | -0.300      | 0.119        |
| *NH <sub>3</sub> →*NH <sub>4</sub> <sup>+</sup> | 2.446       | 2.446       | /            |

**Supplementary Table 15.** Calculated Gibbs free energies change of elementary step in NO<sub>3</sub>RR on BS-Co at different pH.

|                                                 | <i>pH=0</i> | <i>pH=7</i> | <i>pH=14</i> |
|-------------------------------------------------|-------------|-------------|--------------|
| *→*NO <sub>3</sub> H                            | 0.881       | 0.881       | 0.881        |
| *NO <sub>3</sub> H→O <sub>2</sub> N*            | -1.395      | -0.976      | -0.138       |
| O <sub>2</sub> N*→*NO <sub>2</sub> H            | -0.360      | 0.059       | 0.897        |
| *NO <sub>2</sub> H→ON*                          | -1.118      | -0.699      | 0.139        |
| ON*→*NOH                                        | 0.490       | 0.909       | 1.747        |
| *NOH→*NHOH                                      | -0.812      | -0.393      | 0.445        |
| *NHOH→*NH                                       | -1.205      | -0.786      | 0.052        |
| *NH→*NH <sub>2</sub>                            | -1.240      | -0.821      | 0.018        |
| *NH <sub>2</sub> →*NH <sub>3</sub>              | -0.436      | -0.017      | 0.082        |
| *NH <sub>3</sub> →*NH <sub>4</sub> <sup>+</sup> | -1.069      | -1.069      | /            |

**Supplementary Table 16.** Calculated Gibbs free energies change of elementary step in NO<sub>3</sub>RR on EA-Co at different pH.

|                                      | <i>pH=0</i> | <i>pH=7</i> | <i>pH=14</i> |
|--------------------------------------|-------------|-------------|--------------|
| *→*NO <sub>3</sub> H                 | 0.0006      | 0.0006      | 0.0006       |
| *NO <sub>3</sub> H→O <sub>2</sub> N* | -2.565      | -2.146      | -1.727       |

|                             |         |        |        |
|-----------------------------|---------|--------|--------|
| $O_2N^* \rightarrow *NO_2H$ | -1.703  | -1.284 | -0.865 |
| $*NO_2H \rightarrow ON^*$   | -0.518  | -0.099 | 0.320  |
| $ON^* \rightarrow *NOH$     | 0.188   | 0.607  | 1.026  |
| $*NOH \rightarrow *NHOH$    | -1.373  | -0.954 | -0.535 |
| $*NHOH \rightarrow *NH$     | -0.653  | -0.234 | 0.185  |
| $*NH \rightarrow *NH_2$     | 0.370   | 0.789  | 1.208  |
| $*NH_2 \rightarrow *NH_3$   | -0.0236 | 0.183  | 0.602  |
| $*NH_3 \rightarrow *NH_4^+$ | 0.242   | 0.242  | /      |

**Supplementary Table 17.** Calculated Gibbs free energies change of elementary step in  $NO_3RR$  on ES-Co at different pH.

|                             | <i>pH=0</i> | <i>pH=7</i> | <i>pH=14</i> |
|-----------------------------|-------------|-------------|--------------|
| $* \rightarrow *NO_3H$      | 0.505       | 0.505       | 0.505        |
| $*NO_3H \rightarrow O_2N^*$ | -2.984      | -2.565      | -2.146       |
| $O_2N^* \rightarrow *NO_2H$ | -0.418      | 0.001       | 0.420        |
| $*NO_2H \rightarrow ON^*$   | -0.277      | 0.142       | 0.561        |
| $ON^* \rightarrow *NOH$     | 0.802       | 1.221       | 1.640        |
| $*NOH \rightarrow *NHOH$    | -0.772      | -0.353      | 0.066        |
| $*NHOH \rightarrow *NH$     | -0.084      | 0.335       | 0.754        |
| $*NH \rightarrow *NH_2$     | -1.574      | -1.155      | -0.736       |
| $*NH_2 \rightarrow *NH_3$   | -1.219      | -0.800      | -0.381       |
| $*NH_3 \rightarrow *NH_4^+$ | 0.519       | 0.519       | /            |

**Supplementary Table 18.** Calculated Gibbs free energies change of elementary step in  $NO_3RR$  on BA-Ni at different pH.

|                             | <i>pH=0</i> | <i>pH=7</i> | <i>pH=14</i> |
|-----------------------------|-------------|-------------|--------------|
| $* \rightarrow *NO_3H$      | 0.322       | 0.322       | 0.322        |
| $*NO_3H \rightarrow O_2N^*$ | -1.717      | -1.298      | -0.879       |
| $O_2N^* \rightarrow *NO_2H$ | -0.573      | -0.154      | 0.265        |
| $*NO_2H \rightarrow ON^*$   | -1.125      | -0.706      | -0.287       |
| $ON^* \rightarrow *NOH$     | 1.119       | 1.538       | 1.957        |
| $*NOH \rightarrow *NHOH$    | -1.051      | -0.632      | -0.213       |
| $*NHOH \rightarrow *NH$     | -0.434      | -0.015      | 0.404        |
| $*NH \rightarrow *NH_2$     | -1.673      | -1.254      | -0.835       |
| $*NH_2 \rightarrow *NH_3$   | -1.151      | -0.732      | -0.313       |
| $*NH_3 \rightarrow *NH_4^+$ | 2.485       | 2.485       | /            |

**Supplementary Table 19.** Calculated Gibbs free energies change of elementary step in  $NO_3RR$  on BS-Ni at different pH.

|                             | <i>pH=0</i> | <i>pH=7</i> | <i>pH=14</i> |
|-----------------------------|-------------|-------------|--------------|
| $* \rightarrow *NO_3H$      | 0.499       | 0.499       | 0.499        |
| $*NO_3H \rightarrow O_2N^*$ | -1.336      | -0.917      | -0.498       |
| $O_2N^* \rightarrow *NO_2H$ | -0.328      | 0.091       | 0.510        |
| $*NO_2H \rightarrow ON^*$   | -1.217      | -0.798      | -0.379       |
| $ON^* \rightarrow *NOH$     | 0.487       | 0.906       | 1.325        |
| $*NOH \rightarrow *NHOH$    | -0.778      | -0.359      | 0.060        |
| $*NHOH \rightarrow *NH$     | -1.313      | -0.894      | -0.475       |

|                                                              |        |        |        |
|--------------------------------------------------------------|--------|--------|--------|
| *NH $\rightarrow$ *NH <sub>2</sub>                           | -1.104 | -0.685 | -0.266 |
| *NH <sub>2</sub> $\rightarrow$ *NH <sub>3</sub>              | -0.381 | 0.038  | 0.457  |
| *NH <sub>3</sub> $\rightarrow$ *NH <sub>4</sub> <sup>+</sup> | 0.310  | 0.310  | /      |

**Supplementary Table 20.** Calculated Gibbs free energies change of elementary step in NO<sub>3</sub>RR on EA-Ni at different pH.

|                                                              | <i>pH=0</i> | <i>pH=7</i> | <i>pH=14</i> |
|--------------------------------------------------------------|-------------|-------------|--------------|
| * $\rightarrow$ *NO <sub>3</sub> H                           | 0.251       | 0.251       | 0.251        |
| *NO <sub>3</sub> H $\rightarrow$ O <sub>2</sub> N*           | -3.132      | -2.713      | -2.293       |
| O <sub>2</sub> N* $\rightarrow$ *NO <sub>2</sub> H           | 0.545       | 0.964       | 1.383        |
| *NO <sub>2</sub> H $\rightarrow$ ON*                         | -1.437      | -1.018      | -0.599       |
| ON* $\rightarrow$ *NOH                                       | 1.035       | 1.454       | 1.873        |
| *NOH $\rightarrow$ *N                                        | -3.409      | -2.990      | -2.571       |
| *N $\rightarrow$ *NH                                         | -0.885      | -0.466      | -0.047       |
| *NH $\rightarrow$ *NH <sub>2</sub>                           | -0.078      | 0.341       | 0.760        |
| *NH <sub>2</sub> $\rightarrow$ *NH <sub>3</sub>              | 0.702       | 1.121       | -1.540       |
| *NH <sub>3</sub> $\rightarrow$ *NH <sub>4</sub> <sup>+</sup> | 0.003       | 0.003       | /            |

**Supplementary Table 21.** Calculated Gibbs free energies change of elementary step in NO<sub>3</sub>RR on ES-Ni at different pH.

|                                                              | <i>pH=0</i> | <i>pH=7</i> | <i>pH=14</i> |
|--------------------------------------------------------------|-------------|-------------|--------------|
| * $\rightarrow$ *NO <sub>3</sub> H                           | 0.863       | 0.863       | 0.863        |
| *NO <sub>3</sub> H $\rightarrow$ O <sub>2</sub> N*           | -2.533      | -2.114      | -1.694       |
| O <sub>2</sub> N* $\rightarrow$ *NO <sub>2</sub> H           | 0.688       | 1.107       | 1.526        |
| *NO <sub>2</sub> H $\rightarrow$ ON*                         | -1.123      | -0.704      | -0.285       |
| ON* $\rightarrow$ *NOH                                       | 0.227       | 0.646       | 1.066        |
| *NOH $\rightarrow$ *NHOH                                     | -0.593      | -0.174      | 0.245        |
| *NHOH $\rightarrow$ *NH                                      | 0.125       | 0.544       | 0.963        |
| *NH $\rightarrow$ *NH <sub>2</sub>                           | -1.670      | -1.251      | -0.832       |
| *NH <sub>2</sub> $\rightarrow$ *NH <sub>3</sub>              | -1.625      | -1.206      | -0.787       |
| *NH <sub>3</sub> $\rightarrow$ *NH <sub>4</sub> <sup>+</sup> | 1.924       | 1.924       | /            |

**Supplementary Table 22.** Calculated Gibbs free energies change of elementary step in NO<sub>3</sub>RR on BA-Mn at different pH.

|                                                              | <i>pH=0</i> | <i>pH=7</i> | <i>pH=14</i> |
|--------------------------------------------------------------|-------------|-------------|--------------|
| * $\rightarrow$ *NO <sub>3</sub> H                           | -0.991      | -0.991      | -0.991       |
| *NO <sub>3</sub> H $\rightarrow$ O <sub>2</sub> N*           | -2.231      | -1.812      | -1.393       |
| O <sub>2</sub> N* $\rightarrow$ *NO <sub>2</sub> H           | 0.415       | 0.834       | 1.253        |
| *NO <sub>2</sub> H $\rightarrow$ ON*                         | -2.519      | -2.100      | -1.681       |
| ON* $\rightarrow$ *NOH                                       | 0.984       | 1.403       | 1.822        |
| *NOH $\rightarrow$ *N                                        | -1.560      | -1.141      | -0.722       |
| *N $\rightarrow$ *NH                                         | -0.250      | 0.170       | 0.590        |
| *NH $\rightarrow$ *NH <sub>2</sub>                           | -0.484      | -0.065      | 0.354        |
| *NH <sub>2</sub> $\rightarrow$ *NH <sub>3</sub>              | 0.062       | 0.484       | 0.901        |
| *NH <sub>3</sub> $\rightarrow$ *NH <sub>4</sub> <sup>+</sup> | 0.148       | 0.148       | /            |

**Supplementary Table 23.** Calculated Gibbs free energies change of elementary step in NO<sub>3</sub>RR on BS-Mn at different pH.

|                                                 | <i>pH=0</i> | <i>pH=7</i> | <i>pH=14</i> |
|-------------------------------------------------|-------------|-------------|--------------|
| *→*NO <sub>3</sub> H                            | 0.991       | 0.991       | 0.991        |
| *NO <sub>3</sub> H→O <sub>2</sub> N*            | -1.100      | -0.681      | -0.262       |
| O <sub>2</sub> N*→*NO <sub>2</sub> H            | -0.666      | -0.247      | 0.173        |
| *NO <sub>2</sub> H→ON*                          | -0.472      | -0.053      | 0.366        |
| ON*→*NOH                                        | -0.009      | 0.411       | 0.830        |
| *NOH→*N                                         | -1.063      | -0.644      | -0.225       |
| *N→*NH                                          | -0.799      | -0.38       | 0.040        |
| *NH→*NH <sub>2</sub>                            | -0.600      | -0.179      | 0.241        |
| *NH <sub>2</sub> →*NH <sub>3</sub>              | -1.431      | -1.012      | -0.593       |
| *NH <sub>3</sub> →*NH <sub>4</sub> <sup>+</sup> | 1.088       | 1.088       | /            |

**Supplementary Table 24.** Calculated Gibbs free energies change of elementary step in NO<sub>3</sub>RR on EA-Mn at different pH.

|                                                 | <i>pH=0</i> | <i>pH=7</i> | <i>pH=14</i> |
|-------------------------------------------------|-------------|-------------|--------------|
| *→*NO <sub>3</sub> H                            | -0.875      | -0.875      | -0.875       |
| *NO <sub>3</sub> H→O <sub>2</sub> N*            | -2.054      | -1.635      | -1.216       |
| O <sub>2</sub> N*→*NO <sub>2</sub> H            | 0.629       | 1.148       | 1.467        |
| *NO <sub>2</sub> H→ON*                          | -2.054      | -1.635      | -1.216       |
| ON*→*NOH                                        | 0.052       | 0.471       | 0.890        |
| *NOH→*N                                         | -1.578      | -1.159      | -0.740       |
| *N→*NH                                          | 0.127       | 0.546       | 0.965        |
| *NH→*NH <sub>2</sub>                            | -0.528      | -0.109      | 0.310        |
| *NH <sub>2</sub> →*NH <sub>3</sub>              | -0.001      | 0.418       | 0.837        |
| *NH <sub>3</sub> →*NH <sub>4</sub> <sup>+</sup> | 0.094       | 0.094       | /            |

**Supplementary Table 25.** Calculated Gibbs free energies change of elementary step in NO<sub>3</sub>RR on ES-Mn at different pH.

|                                                 | <i>pH=0</i> | <i>pH=7</i> | <i>pH=14</i> |
|-------------------------------------------------|-------------|-------------|--------------|
| *→*NO <sub>3</sub> H                            | -1.510      | -1.510      | -1.510       |
| *NO <sub>3</sub> H→O <sub>2</sub> N*            | -1.504      | -1.085      | -0.666       |
| O <sub>2</sub> N*→*NO <sub>2</sub> H            | -2.069      | -1.650      | -1.231       |
| *NO <sub>2</sub> H→ON*                          | -0.728      | -0.309      | 0.110        |
| ON*→*NOH                                        | 1.292       | 1.711       | 2.130        |
| *NOH→*NHOH                                      | -1.624      | -1.205      | -0.786       |
| *NHOH→*NH                                       | -0.076      | 0.343       | 0.762        |
| *NH→*NH <sub>2</sub>                            | -0.699      | -0.280      | 0.139        |
| *NH <sub>2</sub> →*NH <sub>3</sub>              | 0.384       | 0.803       | 1.222        |
| *NH <sub>3</sub> →*NH <sub>4</sub> <sup>+</sup> | -0.985      | -0.985      | /            |

**Supplementary Table 26.** The parameters of  $aG(\text{NO}^*)+bG(\text{NH}_2^*)$  and the parameter of linear fits in Figure 4a.

|                  | $\Delta G_1$ | $\Delta G_2$ | $\Delta G_3$ | $\Delta G_4$ | $\Delta G_5$ | $\Delta G_6$ | $\Delta G_7$ | $\Delta G_8$ | $\Delta G_9$ | $\Delta G_{10}$ |
|------------------|--------------|--------------|--------------|--------------|--------------|--------------|--------------|--------------|--------------|-----------------|
| <i>Intercept</i> | 0.696        | 0.826        | 1.190        | 0            | 0.917        | 0.837        | 1.40         | 0.771        | 0            | 0.715           |
| <i>Slope</i>     | 1.002        | 1.004        | 1.005        | 1            | 1.005        | 1            | 1.09         | 0.99         | 1            | 1.01            |
| $R^2$            | 0.71         | 0.77         | 0.70         | 1            | 0.78         | 0.84         | 0.80         | 0.90         | 1            | 0.72            |

**Supplementary Table 27.** The parameters of  $aG(\text{NO}^*)+bG(\text{NH}_2^*)$  and the parameter of linear fits in Figure S8.

|                  | $G(\text{NO}_3\text{H}^*)$ | $G(\text{NO}_2^*)$ | $G(\text{NO}_2\text{H}^*)$ | $G(\text{NO}^*)$ | $G(\text{NOH}^*)$ | $G(\text{NH}_2\text{OH}^*)$ | $G(\text{N}^*)$ | $G(\text{NH}^*)$ | $G(\text{NH}_2^*)$ | $G(\text{NH}_3^*)$ |
|------------------|----------------------------|--------------------|----------------------------|------------------|-------------------|-----------------------------|-----------------|------------------|--------------------|--------------------|
| <i>a</i>         | 0.275                      | 0.503              | 0.843                      | 1                | 0.934             | 0.281                       | 0.212           | -0.252           | 0                  | 0.178              |
| <i>b</i>         | 0.311                      | 0.245              | -0.104                     | 0                | -0.261            | 0.778                       | 1.128           | 1.629            | 1                  | 0.326              |
| <i>Intercept</i> | 2.874                      | 1.227              | 0.096                      | 0                | -1.074            | 2.004                       | 3.647           | 3.459            | 0                  | -4.511             |
| <i>Slope</i>     | 1.002                      | 1.004              | 1.005                      | 1                | 1.005             | 1                           | 1.09            | 0.99             | 1                  | 1.01               |

**Supplementary Table 28.** Calculated Faraday efficiencies for  $\text{NO}_3\text{RR}$  on SA-MoS<sub>2</sub> and MoS<sub>2</sub> substrates.

|    | MoS <sub>2</sub> | BA-Fe        | BS-Fe        | EA-Fe        | ES-Fe        | BA-Co        | BS-Co        | EA-Co        | ES-Co |
|----|------------------|--------------|--------------|--------------|--------------|--------------|--------------|--------------|-------|
| FE | 0                | 0            | 0            | 0            | 0            | 0            | 0            | 100%         | 0     |
|    | <i>BA-Ni</i>     | <i>BS-Ni</i> | <i>EA-Ni</i> | <i>ES-Ni</i> | <i>BA-Mn</i> | <i>BS-Mn</i> | <i>EA-Mn</i> | <i>ES-Mn</i> |       |
| FE | 0                | 99.9%        | 99.5%        | 0            | 0            | 0            | 0            | 0            |       |

**Supplementary Table 29.** Formation energy ( $E_f$ ) and dissolution potential ( $U_{\text{diss}}$ ) of metals. For comparison, the standard dissolution potential ( $U_{\text{diss}}^\circ$ ) of metal atoms are also listed.

| <b>Metal</b> | <b>Metal ion</b> |                                   |                             | <b>Metal Hydroxide</b>            |                             |
|--------------|------------------|-----------------------------------|-----------------------------|-----------------------------------|-----------------------------|
|              | $E_f(\text{eV})$ | $U_{\text{diss}}^\circ(\text{V})$ | $U_{\text{diss}}(\text{V})$ | $U_{\text{diss}}^\circ(\text{V})$ | $U_{\text{diss}}(\text{V})$ |
| BS-Fe        | 3.509            | -0.450                            | -2.205                      | -0.045                            | -1.799                      |
| EA-Co        | -6.497           | -0.280                            | 2.968                       | -0.730                            | 2.519                       |
| ES-Ni        | -14.257          | -0.260                            | 6.869                       | 0.490                             | 7.619                       |
| BS-Mn        | 2.356            | -1.190                            | -2.368                      | -1.470                            | -2.648                      |
| EA-Mn        | -6.557           | -1.190                            | 2.088                       | -1.470                            | 1.8085                      |

## Reference

- [1] LIU J, RICHARDS D, SINGH N, et al. Activity and Selectivity Trends in Electrocatalytic Nitrate Reduction on Transition Metals [J]. ACS Catalysis, 2019, 9(8): 7052-7064.
- [2] VALDÉS A, QU Z W, KROES G J. Oxidation and photo-oxidation of water on TiO<sub>2</sub> surface [J]. 2008, 112(26): 9872–9879.
- [3] LIU X, JIAO Y, ZHENG Y, et al. Building Up a Picture of the Electrocatalytic Nitrogen

- Reduction Activity of Transition Metal Single-Atom Catalysts [J]. *J Am Chem Soc*, 2019, 141(24): 9664-9672.
- [4] GUO X, GU J, LIN S, et al. Tackling the Activity and Selectivity Challenges of Electrocatalysts toward the Nitrogen Reduction Reaction via Atomically Dispersed Biatom Catalysts [J]. *J Am Chem Soc*, 2020, 142(12): 5709-5721.
- [5] LIU J, WANG Y, LI J. Toward Rational Design of Oxide-Supported Single-Atom Catalysts: Atomic Dispersion of Gold on Ceria [J]. *Journal of the American Chemical Society*, 2017, 139(17): 6190-6199.
